1  
2  
3  
4  
5  
6  
7  
8  
9  
10  
11  
12  
13  
14  
15  
16  
17  
18  
19  
20  
21  
22  
23  
24  
25  
26  
27  
28

## Cell cycle S-phase arrest drives cell extrusion

Vivek K. Dwivedi<sup>α</sup>, Carlos Pardo-Pastor<sup>†</sup>, Rita Droste<sup>α</sup>, Daniel P.  
Denning<sup>#,α</sup>, Jody Rosenblatt<sup>†</sup>, and H. Robert Horvitz<sup>α,\*</sup>

<sup>α</sup>Howard Hughes Medical Institute, Department of Biology, Massachusetts  
Institute of Technology, Cambridge, MA 02139, USA

<sup>†</sup>Randall Division of Cell and Molecular Biophysics, King's College London,  
London SE1 1UL, UK

<sup>#</sup>Novartis Institutes for BioMedical Research, Cambridge, MA 02139

\*Correspondence: horvitz@mit.edu

29 **SUMMARY**

30 Cell extrusion is a process of cell elimination in which a cell is squeezed  
31 out from its tissue of origin. Extrusion occurs in organisms as diverse as  
32 sponges, nematodes, insects, fish and mammals. Defective extrusion is linked to  
33 many epithelial disorders, including cancer. Despite broad occurrence, cell-  
34 intrinsic triggers of extrusion conserved across phyla are generally unknown. We  
35 combined genome-wide genetic screens with live-imaging studies of *C. elegans*  
36 embryos and mammalian epithelial cultures and found that S-phase arrest  
37 induced extrusion in both. Cells extruded from *C. elegans* embryos exhibited S-  
38 phase arrest, and RNAi treatments that specifically prevent S-phase entry or  
39 arrest blocked cell extrusion. Pharmacological induction of S-phase arrest was  
40 sufficient to promote cell extrusion from a canine epithelial monolayer. Thus, we  
41 have discovered an evolutionarily conserved cell-cycle-dependent trigger of cell  
42 extrusion. We suggest that S-phase-arrest induced cell extrusion plays a key role  
43 in physiology and disease.

44

45

## 46 INTRODUCTION

47           During development and homeostasis, cells are eliminated by a variety of  
48 mechanisms. One such mechanism is cell extrusion, in which a cell is expelled  
49 from a layer of cells while the continuity of the layer is maintained. Cell extrusion  
50 has been observed in and studied using a wide variety of organisms, including  
51 the sponge *H. caerulea*, *C. elegans*, *D. melanogaster*, zebrafish and mammals,  
52 suggesting that cell extrusion is an evolutionarily conserved mechanism of  
53 eliminating unnecessary or harmful cells (De Goeij *et al.*, 2009; reviewed by  
54 Gudipaty and Rosenblatt, 2017 and Ohsawa *et al.*, 2018). Vertebrate epithelial  
55 tissues use cell extrusion as the primary mode of cell elimination (Gu and  
56 Rosenblatt, 2012; Günther and Seyfert, 2018). Cell extrusion plays a key role in  
57 epithelial defense mechanisms that remove oncogene-transformed cells from  
58 epithelial layers (reviewed by Kajita and Fujita, 2015). Excessive cell extrusion  
59 can produce epithelial layer breaches, like those observed in asthma and  
60 Crohn's disease (Gudipaty and Rosenblatt, 2017). Decreased cell extrusion  
61 leads to the formation of epithelial cell masses and confers resistance to cell  
62 death (Eisenhoffer *et al.*, 2012; Gu *et al.*, 2015). Intestinal polyps, which can  
63 develop into colon cancers, lack clearly identifiable cell extrusions (Eisenhoffer *et*  
64 *al.*, 2012), suggesting that extrusion might be important for the prevention of  
65 polyps and intestinal cancers. Disruption and subversion of the cell-extrusion  
66 process likely promotes tumor growth and metastasis in pancreatic, lung and  
67 colon cancer (Gu *et al.*, 2015).

68           While several mechanisms of cell extrusion have been described for  
69 *Drosophila* and vertebrates, these mechanisms have focused on the cell-cell  
70 interactions and cellular contexts, such as crowding, topological defects, cell  
71 competition, etc., that induce cell extrusion (reviewed by Fadul and Rosenblatt,  
72 2018, Ohsawa *et al.*, 2018). A cell-intrinsic trigger that can induce extrusion in  
73 organisms of different phyla has not been identified.

74           *C. elegans* is an excellent organism for the study of evolutionarily  
75 conserved mechanisms of cell elimination. The discovery of a conserved set of  
76 genes regulating caspase-mediated apoptosis in *C. elegans* has been  
77 fundamental to the understanding of programmed cell death in metazoa  
78 (reviewed by Fuchs and Steller, 2011). Cell extrusion can eliminate cells fated for  
79 death in *C. elegans* (Denning *et al.*, 2012). Embryos with mutations in the  
80 caspase-mediated apoptosis pathway, e.g. loss-of-function mutants of the  
81 caspase gene *ced-3*, eliminate by extrusion a subset of cells that are otherwise  
82 eliminated by caspase-mediated apoptosis and engulfment in wild-type embryos.  
83 Denning *et al.* (2012) determined that the PAR-4 – PIG-1 (mammalian homologs  
84 LKB1 – MELK) kinase cascade is required for cell extrusion by *C. elegans ced-*  
85 *3(lf)* embryos. However, LKB1 (mammalian homolog of PAR-4) was found to  
86 prevent extrusion from mouse embryos (Krawchuk *et al.*, 2015), indicating that  
87 LKB1/PAR-4 is likely not a driver but a regulator of cell extrusion in nematodes  
88 and mammals. No “caspase-equivalent” cell-intrinsic driver of cell extrusion is  
89 known.

90 To seek a conserved cell-intrinsic driver of extrusion, we first  
91 comprehensively identified genes and pathways that control cell extrusion by *C.*  
92 *elegans* and then tested the corresponding pathways for a role in mammalian cell  
93 extrusion. Briefly, we performed a genome-wide RNAi screen for defective cell  
94 extrusion by *C. elegans* and used confocal microscopy to analyze the effect of  
95 RNAi against the identified genes on the cell extrusion process. From this  
96 analysis, we found that cell extrusion by *C. elegans* requires cell-autonomous cell  
97 cycle entry and subsequent S-phase arrest and that circumventing S-phase  
98 arrest blocks extrusion. We then tested and confirmed that pharmacological  
99 induction of S-phase arrest with hydroxyurea (HU) (Timson, 1975; Bianchi *et al.*,  
100 1983) promotes cell extrusion of mammalian epithelial cells. We conclude that S-  
101 phase arrest is a conserved cell-intrinsic trigger of cell extrusion in *C. elegans*  
102 and mammals.

## 103 **RESULTS**

### 104 **Genome-wide RNAi screen identified cell-cycle genes as candidate** 105 **regulators of cell extrusion**

106 In wild-type *C. elegans* embryos, 131 cells are eliminated by caspase-  
107 mediated apoptosis and engulfment. By contrast, in *C. elegans ced-3* caspase  
108 mutants, a few of the cells that would normally undergo programmed cell death  
109 instead are extruded from the developing embryo (Denning *et al.*, 2012). Of the  
110 approximately six cells extruded from *ced-3(lf)* embryos, the cell ABplpappap is  
111 most frequently extruded (Denning *et al.*, 2012 and unpublished). If extrusion  
112 fails to occur, ABplpappap (or descendants of ABplpappap) survive(s) and

113 differentiate(s) into one (or two) supernumerary excretory cell(s), producing  
114 mutant animals with the two (or three)-excretory-cell (Tex) phenotype; by  
115 contrast both wild-type and *ced-3(lf)* animals have one excretory cell (Denning *et al.*  
116 *al.*, 2012; Figure 1A). Mutations that reduce ABplpappap extrusion and produce  
117 the Tex phenotype also reduce the extrusion of other cells (Denning *et al.*, 2012),  
118 making the Tex phenotype a convenient marker for defective cell extrusion.

119 We performed a genome-wide RNAi screen for the Tex phenotype in *ced-*  
120 *3(lf)* animals expressing the GFP excretory-cell reporter  $P_{pgp-12}::4xNLS::GFP$   
121 (Figure 1B; Denning *et al.*, 2012). We screened 11,511 RNAi clones (targeting  
122 about 55% of the ~20,000 *C. elegans* genes by feeding (Rual *et al.*, 2004)) and  
123 found 30 clones targeting 27 unique genes that consistently produced a Tex  
124 phenotype. Three RNAi clones identified genes previously reported to function in  
125 cell extrusion, *grp-1*, *arf-1.2* and *arf-3* (Denning *et al.*, 2012), confirming that this  
126 RNAi screen could identify cell extrusion mutants. Unexpectedly, 10 of the RNAi  
127 clones targeted genes that control cell-cycle progression (Figure 1C), suggesting  
128 a possible role for the cell cycle in controlling cell extrusion.

129 We then tested a nearly complete set of *C. elegans* cell cycle genes for  
130 functional roles in cell extrusion (van den Heuvel, 2005) using an RNAi library of  
131 61 publically available and, when necessary, newly generated clones with each  
132 clone targeting a unique gene (Kamath *et al.*, 2003; Rual *et al.*, 2004; Materials  
133 and Methods). We found that RNAi against four additional cell cycle genes  
134 produced a Tex phenotype (Figure 1C, Supplemental Table 1).

135 Most of the 14 cell-cycle genes we identified are well-characterized  
136 regulators of S-phase entry and progression. These genes include *cdc-25.2*,  
137 which encodes a homolog of the CDK-activating phosphatase CDC25 (Lee *et al.*,  
138 2016); *cdk-1* and *cdk-2*, which encode homologs of CDK1 and CDK2,  
139 respectively (Boxem, 2006); *cye-1* and *cya-1*, which encode homologs of S-  
140 phase cyclins E and A, respectively (Fay and Han, 2000; Kreutzer *et al.*, 1995);  
141 and *psf-1*, *psf-2* and *psf-3*, which encode homologs of pre-replicative and  
142 replicative complex components PSF1, PSF2 and PSF3, respectively (Ossareh-  
143 Nazari *et al.*, 2016; Figure 1C). All of these cell cycle genes with S-phase  
144 function are required for *C. elegans* viability. However, it is unlikely that a general  
145 reduction in embryonic fitness causes the Tex phenotype, as RNAi against  
146 essential genes involved in other phases of the cell cycle (e.g., metaphase-to-  
147 anaphase transition genes *mat-1*, *mat-2*, etc. (reviewed by Yeong, 2004)) or  
148 those involved in transcription (e.g., *cdk-7* and *cdk-9* (Wallenfang and Seydoux,  
149 2002; Bowman *et al.*, 2013)) did not produce the Tex phenotype despite  
150 producing extensive lethality (Supplemental Table 1). Furthermore, as with RNAi  
151 targeting *pig-1* or other genes generally required for cell extrusion (Denning *et al.*,  
152 2012), RNAi against 13 of the 14 identified cell cycle genes produced the Tex  
153 phenotype in *ced-3(lf)* mutants but not in wild-type animals (Supplemental Table  
154 2). Altogether, we found that defects in S-phase entry and progression are  
155 specifically associated with a synthetic *ced-3*-dependent Tex phenotype,  
156 suggesting a role for these cell-cycle genes in promoting cell extrusion.

157 **S-phase entry genes function to promote cell extrusion**

158           Whereas defects in the extrusion of ABplpappap cause the Tex  
159 phenotype, it is possible that the supernumerary excretory cell(s) of some  
160 mutants could arise from other cell lineages. To directly determine whether  
161 genes functioning in S-phase entry are important for cell extrusion, we used time-  
162 lapse confocal microscopy to monitor the extrusion of ABplpappap from *ced-3(lf)*  
163 embryos deficient in *cye-1* or *cdk-2*. To assess extrusion events, we imaged live  
164 embryos with ABplpappap in focus over a 50-minute period ending at the  
165 completion of ventral enclosure, when epidermal cells meet at the ventral midline  
166 following a dorsolateral migration; ventral enclosure coincides with the cell  
167 extrusion that occurs in *ced-3(lf)* embryos (Denning *et al.*, 2012). For clarity, we  
168 refer below to embryos from *ced-3(lf)* parents treated with RNAi against a gene,  
169 say *gene-x*, as “*gene-x(RNAi)* embryos” and to embryos from *ced-3(lf)* parents  
170 treated with RNAi against the empty vector as “control embryos.”

171           In control embryos, cells neighboring ABplpappap on the ventral surface  
172 gradually disappeared from view until ABplpappap was left completely isolated  
173 (Figure 2A, Movie 1), indicating that ABplpappap had been extruded from the  
174 embryo. By comparison, in *cye-1(RNAi)* embryos (Figure 2B, Movie 2) or *cdk-*  
175 *2(RNAi)* embryos (Figure 2C, Movie 3), ABplpappap was surrounded by cells  
176 throughout the imaging period and hence remained within the embryo, failing to  
177 detach. Using dorso-ventral confocal sections from the live embryo imaging, we  
178 reconstructed sagittal views of the embryos during ventral enclosure. These  
179 views confirmed that ABplpappap was extruded ventrally from 10 of 11 control  
180 embryos (Figure 2D, Supplemental Figure 1), whereas ABplpappap failed to



181 detach and was incorporated into the body of *cye-1(RNAi)* embryos (11 of 11  
182 embryos; Figure 2E, Supplemental Figure 2) or *cdk-2(RNAi)* embryos (10 of 11  
183 embryos; Figure 2F, Supplemental Figure 3). These findings demonstrate that  
184 the S-phase entry genes *cye-1* and *cdk-2* are required for ABplpappap extrusion  
185 in *ced-3* embryos.

### 186 **Entry into S phase is required for and precedes cell extrusion**

187 Since genes that promote S-phase entry are required for ABplpappap  
188 extrusion, we tested if cells that undergo extrusion enter S phase. We used a  
189 previously characterized reporter transgene that expresses a truncated human  
190 DNA Helicase B (tDHB)-GFP fusion protein optimized for expression in *C.*  
191 *elegans* and that changes its intracellular location in response to CDK1 and  
192 CDK2 activity (van Rijnberk *et al.*, 2017; Spencer *et al.*, 2013). tDHB-GFP is  
193 enriched in the nuclei of quiescent or post-mitotic cells, whereas it exhibits an  
194 increasing cytoplasmic bias as cells progress from S-phase through mitosis  
195 (Figure 3A; Spencer *et al.*, 2013). In control embryos, tDHB-GFP was mostly  
196 absent from the ABplpappap nucleus (10 of 10 embryos) both before ventral  
197 enclosure (Figure 3B) and as it was extruded (Figure 3E), indicating that  
198 ABplpappap entered S phase prior to its extrusion during the period of ventral  
199 enclosure. Cells extruded from other sites of the embryo also displayed low  
200 levels of nuclear tDHB-GFP (Figures 3I-L). By contrast, in *cye-1(RNAi)* embryos  
201 (Figures 3C, 3F) or *cdk-2(RNAi)* embryos (Figures 3D, 3G) the ABplpappap  
202 nucleus scored positive for the tDHB-GFP fusion protein during the period  
203 around ventral enclosure (10 of 10 embryos each for each RNAi treatment),

204 suggesting that RNAi against these genes prevented both the entry of  
205 ABplpappap into S-phase and its extrusion. Quantification of the nuclear-to-  
206 cytoplasmic ratio of tDHB-GFP fluorescence intensity in ABplpappap in control,  
207 *cye-1(RNAi)* and *cdk-2(RNAi)* embryos at varying stages with respect to ventral  
208 enclosure confirmed these observations (Figure 3H). Some cells were still  
209 extruded in *cye-1(RNAi)* and *cdk-2(RNAi)* embryos, likely reflecting incomplete  
210 inhibition of gene function by RNAi. Consistently, such cells displayed low levels  
211 of nuclear tDHB-GFP, indicating that those cells entered the cell cycle  
212 (Supplemental Figure 4). Thus, cell-cycle entry appears to be a functionally  
213 critical step in the process of cell extrusion.

214 To define more precisely the cell-cycle phase that facilitates cell extrusion,  
215 we used a second reporter transgene (GFP::PCN-1), which expresses an N-  
216 terminal translational fusion of GFP to the *C. elegans* homolog of the DNA  
217 replication processivity factor PCNA (Brauchle *et al.*, 2003). PCNA in mammalian  
218 cells and early *C. elegans* embryonic cells exhibits a punctate, sub-nuclear  
219 localization only during S-phase (Figure 4A; Brauchle *et al.*, 2003; Zerjatke *et al.*,  
220 2017). The localization pattern of GFP::PCN-1 in cell cycles of cells close to  
221 ABplpappap on the embryonic ventral surface matched that described for early  
222 embryonic cells and contrasted with the continuous accumulation of GFP::PCN-1  
223 observed during the *C. elegans* germline cell cycle (Supplemental Figure 5;  
224 Movie 4; Brauchle *et al.*, 2003; Kocsisova *et al.*, 2018). We found that in control  
225 embryos GFP::PCN-1 was localized in bright sub-nuclear foci in ABplpappap  
226 immediately prior to the initiation of ventral enclosure, indicating that this cell was

227 in S phase (5 of 5 embryos) (Figure 4B). By contrast, ABplpappap showed a  
228 diffuse nuclear localization of GFP::PCN-1 in *cye-1(RNAi)* (Figure 4C, 4F) and  
229 *cdk-2(RNAi)* (Figure 4D, 4G) embryos, both before (5 of 5 embryos each) and  
230 after ventral enclosure (5 of 5 embryos each), indicating a failure to enter the cell  
231 cycle. We conclude that cells to be extruded must enter S phase for extrusion to  
232 occur and that blocking S-phase entry prevents cell extrusion.

### 233 **Extruding cells exhibit an arrested S phase and experience replication** 234 **stress**

235         Given that cells required cell-cycle entry for extrusion, we examined the  
236 extent of cell-cycle progression in these cells as they were extruded. In control  
237 embryos, we found that GFP::PCN-1 was localized in bright sub-nuclear foci in  
238 ABplpappap both before (5 of 5 embryos) and after extrusion (5 of 5 embryos)  
239 (Figure 4B, 4E), indicating that ABplpappap entered but did not exit S phase. We  
240 observed no significant changes of GFP::PCN-1 localization in ABplpappap up to  
241 and after its extrusion over a period of 35 min (Figure 4H), indicating that it  
242 remained arrested in S phase. A second unidentified extruding cell showed a  
243 similarly unchanging GFP::PCN-1 localization pattern (Figure 4H). To determine  
244 if the S-phase arrest observed in ABplpappap and the other extruding cell is a  
245 general feature of cell extrusion, we examined other extruded cells in the  
246 embryo. Nearly all cells extruded by *ced-3(lf)* embryos displayed bright sub-  
247 nuclear foci of GFP::PCN-1, consistent with an arrested S phase in these cells  
248 (Figures 4H-J).

249 Arrest of DNA replication during S phase can occur as a result of  
250 replication stress, which can arise for many different reasons (reviewed by  
251 Zeman and Cimprich, 2014). Replication stress triggers the replication stress  
252 response, which stabilizes stalled replication forks, halts cell-cycle progression  
253 and prevents further firing of replication origins (reviewed by Zeman and  
254 Cimprich, 2014). As cells undergoing extrusion are arrested in S-phase, we  
255 asked if triggering the replication stress response was important for extrusion.  
256 Core components of the replication stress response pathway in *C. elegans* and  
257 other metazoans include ATR, Chk1, Rad17, Rad9, Rad1, Hus1, Replication  
258 Protein A, TopBP1, Timeless, Tipin and Claspin proteins (Stevens *et al.*, 2016;  
259 Yazinski and Zou, 2016). RNAi against 7 of the 11 *C. elegans* genes encoding  
260 these core components of the replication-stress checkpoint (*atl-1*, *chk-1*, *hpr-9*,  
261 *mus-101*, *tim-1*, *tipn-1* and *clsp-1*) produced a Tex phenotype in *ced-3(lf)* animals  
262 (Figure 1C, Figure 4L), indicating an involvement of replication stress response in  
263 cell extrusion. These findings suggest that the replication stresses underlying the  
264 S-phase arrest in extruding cells trigger the replication stress response, which  
265 promotes cell extrusion.

### 266 **Bypassing S-phase arrest and completing the cell cycle prevents cell** 267 **extrusion**

268 After determining that S-phase arrest is a key feature of cell extrusion, we  
269 asked whether the previously identified *C. elegans* cell extrusion regulators *pig-1*  
270 (homolog of the mammalian kinase gene *MELK*) and *grp-1* (homolog of the  
271 mammalian ARF GEF gene *CYTH3*) (Denning *et al.*, 2012) also play a role in

272 producing this S-phase arrest. We monitored the fate of ABplpappap in *pig-*  
273 *1(RNAi)* embryos by time-lapse confocal microscopy. Strikingly, we found that  
274 instead of undergoing S-phase arrest, ABplpappap completed the cell cycle and  
275 divided before ventral enclosure in these embryos (Figure 5A; Movie 5). By  
276 examining virtual lateral sections, we found that instead of undergoing extrusion,  
277 as in the case of control embryos (Figure 5B), ABplpappap in *pig-1(RNAi)*  
278 embryos divided to generate daughters that were not extruded (5 of 6 embryos)  
279 (Figure 5C). The same fate of ABplpappap was observed in *grp-1(RNAi)*  
280 embryos (5 of 5 embryos) (Figure 5D). These findings indicate that in addition to  
281 the genes *cye-1* and *cdk-2*, the genes *pig-1* and *grp-1* are required to produce  
282 the S-phase arrest that precedes cell extrusion.

283         Next, we investigated why ABplpappap completed the cell cycle in *pig-*  
284 *1(RNAi)* and *grp-1(RNAi)* embryos. In several cell lineages, such as the Q  
285 neuroblast cell lineage, the genes *pig-1* and *grp-1* are required for unequal cell  
286 divisions that generate apoptotic cells (Cordes *et al.*, 2006; Teuliere *et al.*, 2014).  
287 Consistent with their function in controlling unequal cell division, RNAi against  
288 each of the genes *pig-1* and *grp-1* perturbed the ratio of ABplpappap's size to  
289 that of its sister and generated an abnormally large ABplpappap (Figures 5E,F;  
290 Supplemental Figures 6A,D,E). These findings indicated that unequal cell  
291 division plays an important role in producing the S-phase arrest that precedes  
292 cell extrusion. However, despite the requirement for *cye-1* and *cdk-2* to produce  
293 this S-phase arrest (Figures 3B, 4B), RNAi against *cye-1* or *cdk-2* did not affect  
294 unequal cell division. Neither the size of ABplpappap relative to that of its sister

295 nor the absolute size of ABplpappap showed a difference among *cye-1(RNAi)*,  
296 *cdk-2(RNAi)* and control embryos (Figures 5G,H; Supplemental Figure 6A,B,C).  
297 Together, our data indicate that genes required for cell extrusion function to  
298 produce the S-phase arrest preceding extrusion either by promoting S-phase  
299 entry (via *cye-1* and *cdk-2*) or by preventing cell-cycle completion (via *pig-1* and  
300 *grp-1*).

301 Another difference consistent with the distinct ways by which the cell-cycle  
302 genes and unequal-cell-division genes promote cell extrusion was observed in  
303 the Tex phenotype caused by RNAi against these genes. Some *pig-1(RNAi)* and  
304 *grp-1(RNAi)* animals with the Tex phenotype displayed two supernumerary  
305 excretory cells (Figure 5I), presumably because both daughters of ABplpappap  
306 adopted the excretory-cell in these animals. By contrast, *cye-1(RNAi)* and *cdk-*  
307 *2(RNAi)* animals with the Tex phenotype displayed only one supernumerary  
308 excretory cell (Figure 5I), presumably because ABplpappap did not enter and  
309 then complete the cell cycle but rather differentiated directly into an excretory  
310 cell.

311 In short, these findings indicate that the unifying feature of all genes  
312 required for cell extrusion is that they function to produce the S-phase arrest  
313 observed in cells to be extruded, supporting the conclusion that S-phase arrest is  
314 a key requirement of cell extrusion. Either preventing cell-cycle entry or  
315 bypassing the S-phase arrest to complete cell division prevented cell extrusion in  
316 developing *C. elegans* embryos.

317

318 **S-phase arrest drives cell extrusion from mammalian epithelial cultures**

319           Since S-phase arrest is the central feature of cell extrusion by *C. elegans*  
320 embryo, we asked if S-phase arrest also induces mammalian cell extrusion. We  
321 used a monolayer of Madin-Darby Canine Kidney (MDCK) cells as a model of  
322 mammalian epithelia and hydroxyurea (HU) as a chemical agent for inducing S-  
323 phase arrest. MDCK cells are a simple epithelial system for studies of  
324 mammalian cell extrusion in culture (reviewed by Ohsawa *et al.*, 2018). HU  
325 causes S-phase arrest by inhibiting the enzyme ribonucleotide reductase and  
326 depleting deoxyribonucleotides during DNA replication, resulting in stalled DNA  
327 replication forks (Timson, 1975; Bianchi *et al.*, 1983). We treated MDCK  
328 monolayers with either 2 mM HU or vehicle (negative control) for up to 24 h and  
329 obtained time-lapse micrographs of the monolayers from this period to assess  
330 cell extrusion. Strikingly, cells extruded apically from the MDCK monolayer into  
331 the culture medium were three to four times higher in number after HU treatment  
332 when compared to the number of cells extruded apically after vehicle treatment  
333 (Figure 6A, 6B; Movie 6,7). Next we used MDCK-Fucci cells to determine the cell  
334 cycle phase distribution of HU- and vehicle-treated extruded cells (Streichan *et*  
335 *al.*, 2014). MDCK-Fucci cells produce a fluorescent signal that varies with the  
336 phase of the cell cycle (G0/G1-Red, S/G2/M-Green; Sakaue-Sawano *et al.*,  
337 2008). As expected, most of the HU-treated extruded cells displayed a green  
338 fluorescent signal (Figure 6C), indicating that they were in a cell cycle phase  
339 subsequent to the onset of DNA replication. We noted that stochastically  
340 extruded cells (from vehicle treatment) mostly exhibited red fluorescence

341 indicative of the G0 or G1 phase (Figure 6D), consistent with the phase of cells  
342 that are naturally extruded from post-mitotic zones, such as the tips of intestinal  
343 villi (Carroll *et al.*, 2018; Eisenhoffer *et al.*, 2012).

344         Since HU is known to increase the rate of apoptosis (Timson, 1975), and  
345 agents that promote apoptosis increase the rate of cell extrusion (Andrade and  
346 Rosenblatt, 2011), we examined the role of apoptosis in HU-induced cell  
347 extrusion. Surprisingly, the fraction of extruded MDCK cells that were apoptotic  
348 was not increased by HU treatment (Figure 6D), indicating that HU-induced cell  
349 extrusion is not a consequence of an increase in the rate of apoptosis. In  
350 addition, we reseeded the extruded MDCK cells in fresh media to measure their  
351 viability following HU treatment. We found that the number of viable adherent  
352 cells at 2 hours post reseeded was proportional to the number of extrusions for  
353 both the HU- and vehicle-treated groups (Figure 6E). Additionally, the number of  
354 HU-treated cells doubled at 24 hours post reseeded when compared to 2 hours  
355 post reseeded (Figure 6E). Thus, cells extruded by HU treatment were not only  
356 viable but also able to resume and complete the cell cycle.

357         Taken together, the above findings indicate that S-phase arrest drives the  
358 extrusion of cells from mammalian epithelia and establish that cell extrusion  
359 caused by S-phase arrest is an evolutionarily conserved phenomenon.

## 360 **DISCUSSION**

361         Here we report that cell cycle S-phase arrest is a cell-intrinsic trigger of  
362 cell extrusion and can induce the extrusion of cells of organisms from two  
363 divergent branches of the phylogenetic tree - nematodes and mammals. Using



364 RNAi screens and transgenic cell-cycle reporters, we determined in developing  
365 *C. elegans* embryos that perturbations that prevented S-phase arrest blocked cell  
366 extrusion. As summarized in Figure 7A, cells destined for extrusion from *ced-3(lf)*  
367 embryos are always the smaller daughters of unequal cell divisions. These  
368 smaller daughter cells enter S phase of the cell cycle and undergo S-phase  
369 arrest, likely because of a deficiency in the energetic and metabolic resources  
370 required for DNA synthesis (e.g., nucleotides, replication proteins, etc.). Thus,  
371 either bypassing S-phase arrest (by perturbing the process of unequal cell  
372 division) and hence completing cell division or preventing S-phase arrest (by  
373 blocking cell-cycle entry) prevents cell extrusion in *C. elegans* embryos.

374 To test the generality of our findings, we used mammalian epithelia  
375 treated with HU and showed that S-phase arrest is sufficient to promote cell  
376 extrusion. Thus, cell extrusion triggered by S-phase arrest is an evolutionarily  
377 conserved mechanism of cell elimination. These observations also demonstrate  
378 that cells can be extruded from mitotically active mammalian epithelial tissues.  
379 Previous studies of mammalian cell extrusion focused on extrusion from post-  
380 mitotic tissues (Rosenblatt *et al.*, 2001; Eisenhoffer *et al.*, 2012; Gudipaty *et al.*,  
381 2017; Saw *et al.*, 2017; Kocgozlu *et al.*, 2016) or oncogene-driven extrusion from  
382 growth-suppressing epithelial environments (Anton *et al.*, 2018; Hogan *et al.*,  
383 2009; Kajita *et al.*, 2010; Leung and Brugge, 2012; Slattum *et al.*, 2014; Wu *et*  
384 *al.*, 2014).

385 Our mechanistic model for the evolutionarily conserved process by which  
386 S-phase arrest promotes cell extrusion is presented in Figure 7B. In this model, a

387 mitotically active cell destined for extrusion (i) enters the cell cycle, (ii) arrests in  
388 S phase, (iii) loses cell adhesion (see below), and (iv) is extruded as a result of  
389 reduced adhesion and forces generated by external morphological or  
390 physiological processes.

### 391 **Why are S-phase arrested cells susceptible to extrusion?**

392 We observed previously that cells extruded by *C. elegans* embryos do not  
393 express the classical E-cadherin HMR-1 and other cell-adhesion molecules  
394 (Denning *et al.*, 2012). The absence of such adhesion molecules likely allows  
395 cells to be squeezed out of the embryo by morphological forces generated by  
396 migrating hypodermal cells and neighboring neuroblasts during ventral enclosure  
397 (Chisholm and Hardin, 2005; Wernike *et al.*, 2016). Consistent with this view, the  
398 loss of E-cadherin-mediated adhesion caused by cleavage of the extracellular  
399 part of a cell's E-cadherin molecules is sufficient to drive cell extrusion from an  
400 MDCK monolayer (Grieve and Rabouille, 2014). We speculate that a signaling  
401 pathway initiated by S-phase arrest downregulates the expression of cell  
402 adhesion molecules in cells destined for extrusion. Indeed, in HeLa cell cultures,  
403 cell adhesion increases during S phase via the activity of the cell-cycle regulator  
404 CDK1 and decreases later in the cell cycle upon inhibition of CDK1 by Wee1  
405 (Jones *et al.*, 2018). Interestingly, activation of the replication stress response,  
406 which is required for cell extrusion in *C. elegans* (Figure 1C, 4L), blocks CDK1  
407 activity (Jin *et al.*, 2003; Mailand *et al.*, 2002; Xiao *et al.*, 2003). Furthermore, HU-  
408 mediated S-phase arrest also inactivates CDK1 in MDCK cells (Anton *et al.*,  
409 2018). We therefore propose that a reduction in CDK1 activity following S-phase

410 arrest decreases cell adhesion, thereby facilitating the extrusion of cells  
411 subjected to external forces from cellular neighbors.

#### 412 **Extrusion of S-phase arrested cells is likely tumor-suppressive**

413         Replication forks under prolonged S-phase arrest can collapse and  
414 produce DNA damage, genomic rearrangements and ploidy defects, all of which  
415 are associated with oncogenesis (reviewed by Gaillard *et al.*, 2015). The human  
416 genes that promote replication stress and S-phase arrest are frequently  
417 amplified, overexpressed or activated by mutations in tumors (Otto and Sicinski,  
418 2017). Cells in such tumors experience persistent replication stress that can lead  
419 to S-phase arrest (Gaillard *et al.*, 2015). Hence, tumor cells and cells with  
420 oncogenic potential might well be eliminated via cell extrusion, in which case the  
421 extrusion of cells arrested in S phase would be tumor-suppressive. We propose  
422 that cell extrusion driven by S-phase arrest is a checkpoint mechanism that  
423 functions to eliminate cells at all stages of the oncogenic transformation process,  
424 ranging from precancerous cells in S-phase arrest to tumor cells in a malignant  
425 tumor.

#### 426 **Subversion of cell extrusion driven by S-phase arrest might contribute to** 427 **metastasis**

428         Inactivation of either S1P<sub>2</sub> or the tumor suppressor APC or expression of  
429 oncogenic K-Ras changes the direction of cell extrusion from apical, which favors  
430 cell elimination by extrusion into the lumen, to basal, which favors dissemination  
431 of extruded cells to surrounding tissue (Gu *et al.*, 2015; Marshall *et al.*, 2011;  
432 Slattum *et al.*, 2014). Mutations in these genes are hallmarks of metastatic

433 tumors. While cell extrusion caused by S-phase arrest likely can suppress tumor  
434 development, the same mechanism of cell extrusion might paradoxically promote  
435 cancer metastasis if the extrusion direction changes from apical to basal. We  
436 observed that cells subjected to HU-mediated extrusion failed to die (Figure 6D)  
437 and instead were capable of reentering the cell cycle and proliferating (Figure  
438 6E). Thus, basal extrusion of cells arrested in S-phase might facilitate metastasis  
439 by disseminating live tumor cells arrested in S phase to other tissues and organs.  
440 We propose that mutations in genes, such as S1P<sub>2</sub>, APC and K-Ras, promote  
441 metastasis by facilitating the basal extrusion and spread of tumor cells arrested  
442 in S phase.

443         In summary, we have discovered a novel conserved mechanism that links  
444 a cell-cycle vulnerability to the process of cell extrusion. We suggest that cell  
445 extrusion mediated by S-phase arrest is a mechanism of cell elimination common  
446 to all metazoa. These findings have implications for the field of cancer biology, as  
447 cell extrusion caused by S-phase arrest likely regulates both the survival and  
448 spread of tumor cells.  
449

450 **ACKNOWLEDGMENTS**

451 We thank S. van den Heuvel for providing strains; the CGC, which is funded by  
452 NIH Office of Research Infrastructure Programs (P40 OD010440), for providing  
453 some strains; N. An and T. Ljungars for strain management; S. Luo, S.R. Sando,  
454 A. Doi, and A. Corriero and other members of the Horvitz laboratory for helpful  
455 discussions, and D. Ghosh, C.L. Pender, J.N. Kong, M.G. Vander Heiden, P.W.  
456 Reddien, R.O. Hynes for suggestions regarding the manuscript. V.K.D. was a  
457 Howard Hughes Medical Institute International Student Research fellow. C.P.P.  
458 is the recipient of a Human Frontiers Science Program postdoctoral fellowship  
459 (LT000654/2019-L). J.R. and C.P.P. were funded by King's College London  
460 startup funds. H.R.H. is the David H. Koch Professor of Biology at MIT and an  
461 Investigator at the Howard Hughes Medical Institute.

462 **AUTHOR CONTRIBUTIONS**

463 H.R.H. supervised the project. V.K.D. and H.R.H. conceptualized the project.  
464 V.K.D. and H.R.H. designed the experiments that used *C. elegans*. V.K.D. and  
465 R.D. performed the experiments that used *C. elegans*. V.K.D., R.D. and D.P.D.  
466 generated reagents. C.P. and J.R. designed the experiments that used  
467 mammalian cells. C.P. performed the experiments that used mammalian cells.  
468 V.K.D., D.P.D. and H.R.H. wrote the original manuscript draft. All authors  
469 contributed to data analysis, interpretation, and reviewing and editing of the  
470 manuscript.

471 **Declaration of Interests**

472 The authors declare no competing interests.

## Figure 1

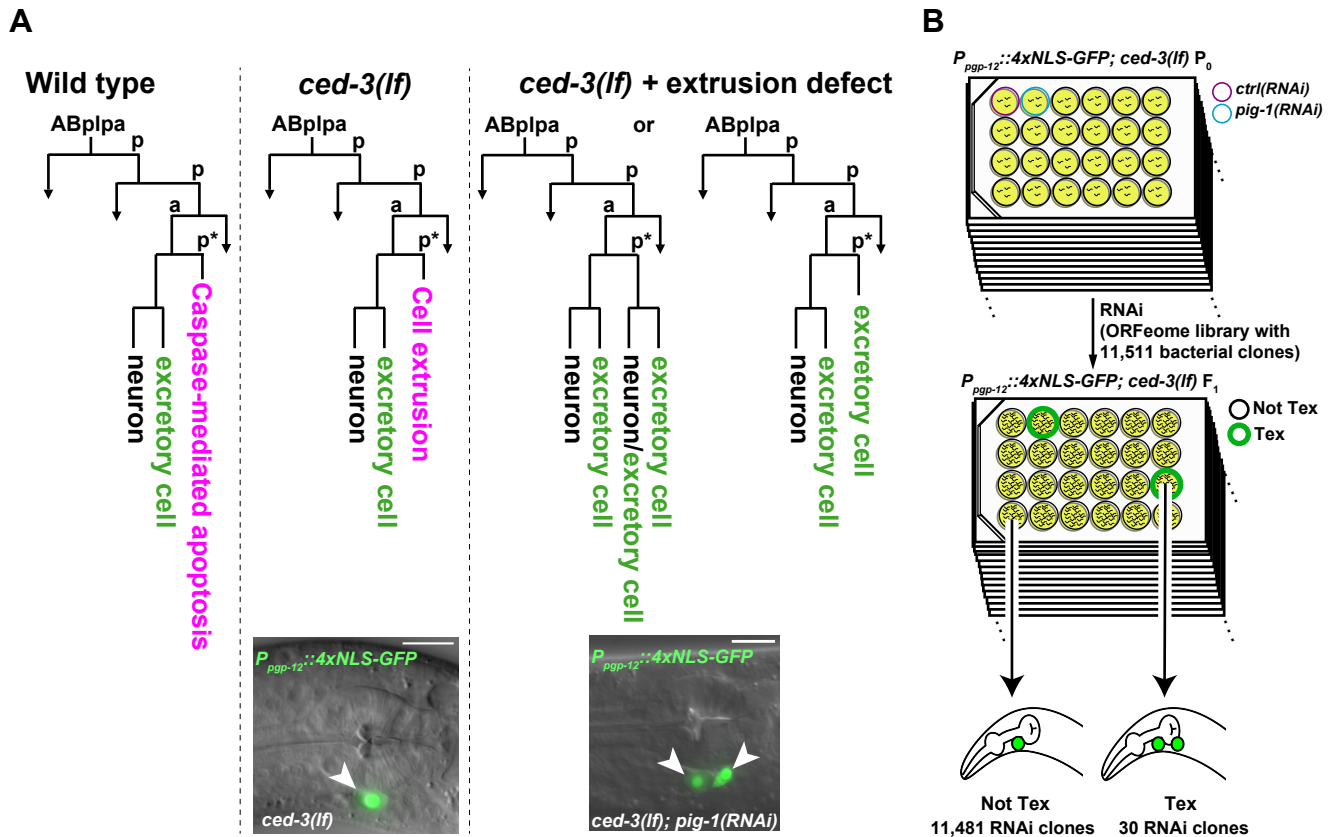

**C**

### Cell cycle genes with a candidate role in cell extrusion based on RNAi-induced Tex phenotype

| RNAi target gene                                                                    | % Tex (n)                        | Mammalian homolog | G1/S Role | Role/Function in cell cycle                                                                                                        |
|-------------------------------------------------------------------------------------|----------------------------------|-------------------|-----------|------------------------------------------------------------------------------------------------------------------------------------|
| Control                                                                             | 1 (107)                          | -                 | -         | -                                                                                                                                  |
| <i>cdc-25.2</i> <sup>‡</sup>                                                        | 21 (159)                         | CDC25             | Yes       | Protein phosphatase that removes inhibitory phosphorylations from cyclin dependent kinases (CDKs) 1 and 2                          |
| <i>cya-1</i> <sup>‡</sup>                                                           | 12 (363)                         | Cyclin A          | Yes       | Protein that binds to CDK2 to regulate S-phase progression and to CDK1 to regulate progression through G2 and M phases             |
| <i>cye-1</i> <sup>‡</sup>                                                           | 87 (165)                         | Cyclin E          | Yes       | Protein that binds to CDK2 to regulate transition from G1 to S phase of the cell cycle                                             |
| <i>cdk-1</i> <sup>‡</sup>                                                           | 15 (61)                          | CDK1              | Yes       | CDK that can bind to multiple cyclin proteins to phosphorylate targets for the positive regulation of cell cycle progression       |
| <i>cdk-2</i>                                                                        | 65 (181)                         | CDK2              | Yes       | CDK that binds to Cyclins E and A to promote S-phase entry and progression, respectively                                           |
| <i>psf-1</i> <sup>‡</sup><br><i>psf-2</i> <sup>‡</sup><br><i>psf-3</i> <sup>‡</sup> | 36 (116)<br>39 (156)<br>50 (105) | GINS Complex      | Yes       | Proteins that function as components of a complex that is involved in DNA replication origin firing and replication progression    |
| <i>csn-1</i> <sup>‡</sup><br><i>csn-4</i> <sup>‡</sup><br><i>csn-5</i> <sup>‡</sup> | 43 (132)<br>47 (141)<br>39 (145) | COP9 Signalosome  | Maybe     | Proteins that function as components of a complex that is required for the function of SCF E3 ligases that regulate the cell cycle |
| <i>atl-1</i><br><i>chk-1</i>                                                        | 9 (444)<br>9 (220)               | ATR<br>Chk1       | Yes       | Proteins that function in the replication stress checkpoint response                                                               |

<sup>‡</sup>Genes identified from the genome-scale RNAi screen

473 **Figure 1 A Genome-wide RNAi screen for genes required for cell extrusion**  
474 **identifies multiple cell-cycle genes**

475 (A) Lineage diagrams show the fate of the cell ABplpappap (marked with an \*) in  
476 embryos that are wild-type, embryos with a *ced-3(lf)* mutation and embryos with  
477 a *ced-3(lf)* mutation and a defect in cell extrusion. A micrograph of the  
478 pharyngeal region showing excretory cell(s), which express nuclear GFP and are  
479 marked with white arrowhead(s), is shown for a representative *ced-3(lf)* animal  
480 and a *ced-3(lf)* + extrusion defect (*ced-3(lf); pig-1(RNAi)*) animal below the  
481 corresponding cell-lineage diagrams. Scale bar, 10  $\mu$ m.

482 (B) Schematic representation of the genome-wide RNAi screen for the Tex  
483 phenotype.

484 (C) RNAi clone targets with a function in the cell cycle identified from the  
485 genome-wide or candidate-based RNAi screens for the Tex phenotype and the  
486 corresponding penetrance of the Tex phenotype. The mammalian homologs of  
487 these genes and their functions in mammals are shown. G1/S Role indicates  
488 whether an identified RNAi target has a role in G1, G1-to-S phase transition or S-  
489 phase progression in mammals. ‡, genes identified from the genome-wide RNAi  
490 screen; other genes were identified from a candidate RNAi screen of cell cycle  
491 genes for the Tex phenotype (Supplemental Table 1).

492

**Figure 2**

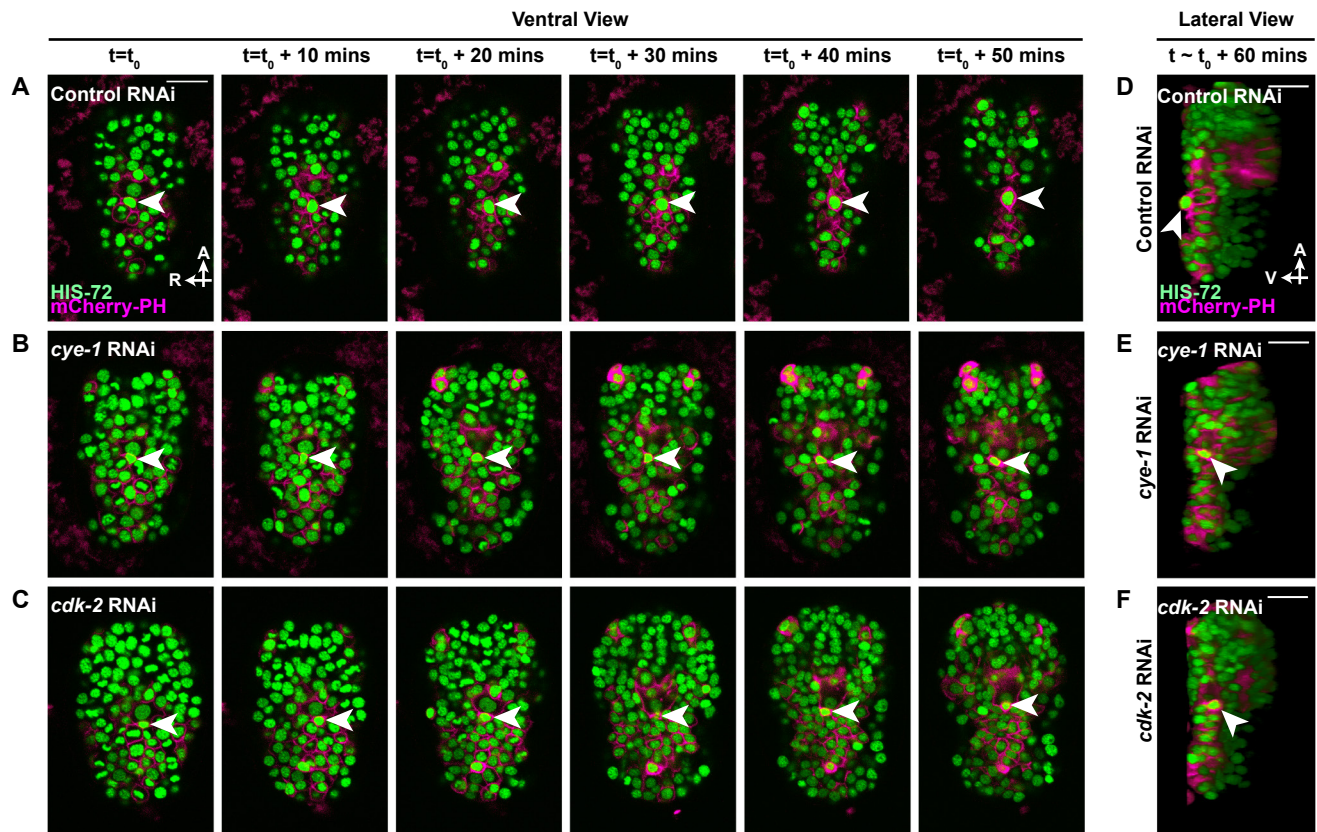



493 **Figure 2 Cell extrusion of ABplpappap requires the function of the cell-**  
494 **cycle genes *cye-1* and *cdk-2***

495 (A-C) Micrographs of the ventral surface obtained at 10-min intervals over a  
496 period of 50 min using time-lapse confocal microscopy show the location of  
497 ABplpappap (arrowhead) on the ventral surface with respect to other embryonic  
498 cells in (A) control, (B) *cye-1(RNAi)*, and (C) *cdk-2(RNAi)* embryos. The embryos  
499 shown carried the transgenes *stIs10026* and *nIs632*. A, anterior; R, right. Scale  
500 bar, 10  $\mu$ m.

501 (D-F) Virtual lateral sections through the ABplpappap cell in *ced-3(lf)* embryos  
502 show the relative location of ABplpappap (arrowhead) in (D) control, (E) *cye-*  
503 *1(RNAi)*, and (F) *cdk-2(RNAi)* embryos. Embryos shown in (D), (E) and (F) are  
504 the same as those in (A), (B) and (C), respectively. A, anterior; V, ventral. Scale  
505 bar, 10  $\mu$ m.

506

## Figure 3

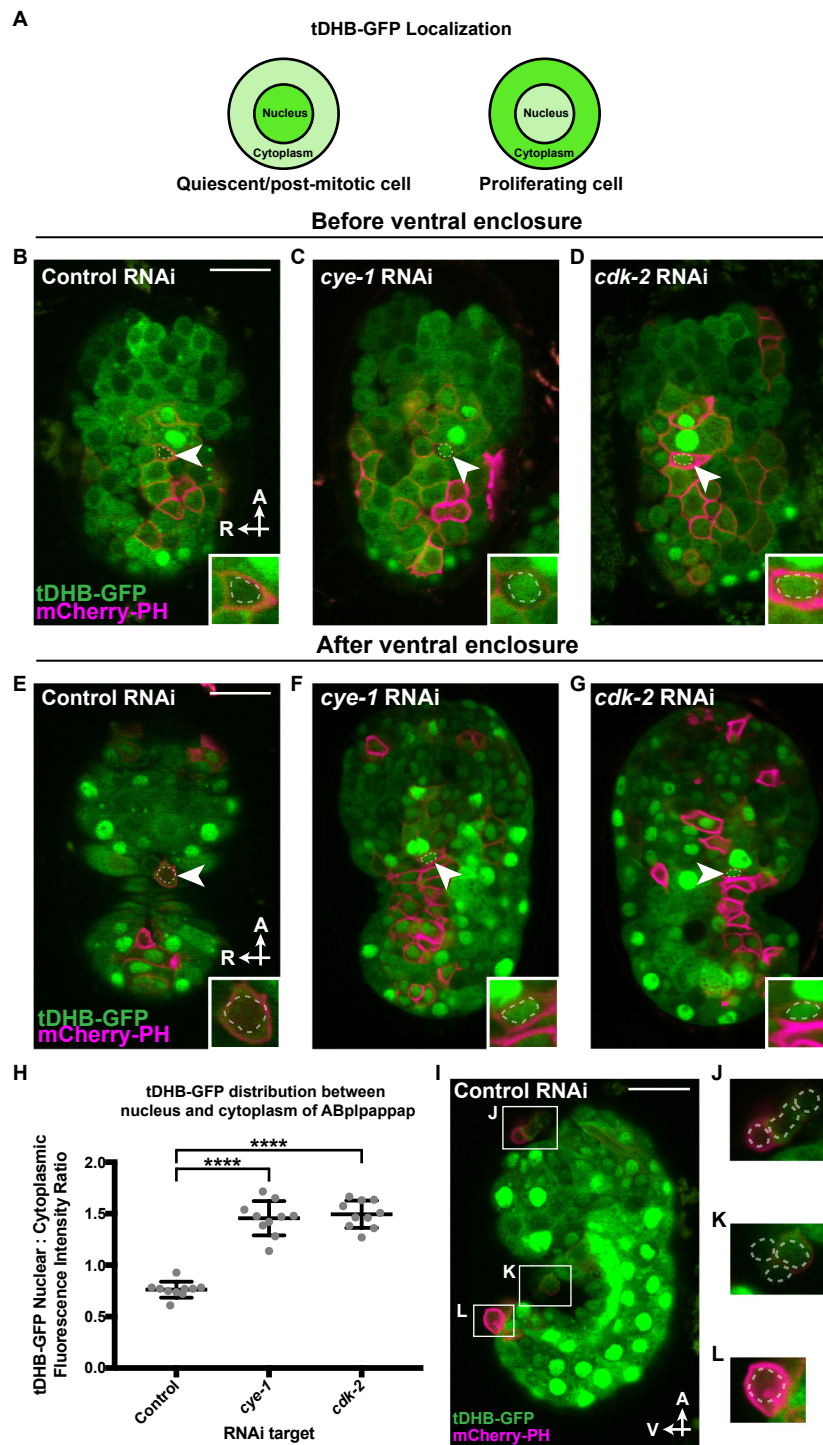

507 **Figure 3 Cells that are extruded enter the cell cycle and are extruded in a**  
508 ***cye-1*- and *cdk-2*-dependent manner**

509 (A) Schematic showing the relative nuclear/cytoplasmic localization of a  
510 truncated DHB (tDHB) – GFP fusion protein in a quiescent/post-mitotic cells and  
511 in cells between S phase and mitosis in the cell cycle (van Rijnberk *et al.*, 2017).

512 (B-G) Micrographs of the ventral surface, including ABplpappap (arrowhead), of  
513 *ced-3(lf)* embryos expressing tDHB-GFP obtained (B-D) prior to and (E-G) post  
514 ventral enclosure using confocal microscopy in (B,E) control embryos, (C,F) *cye-*  
515 *1 (RNAi)* embryos, and (D,G) *cdk-2(RNAi)* embryos. Inset, a magnified view of  
516 the ABplpappap cell. The ABplpappap nucleus, as determined by Nomarski  
517 optics, is marked by a dotted line in each image and inset. The embryos shown  
518 carried transgenes *heSi192* and *nIs861*. A, anterior; R, right. Scale bar, 10  $\mu$ m.

519 (H) Quantification of the ratio of tDHB-GFP fluorescence intensity in the nucleus  
520 to that in the cytoplasm in control, *cye-1(RNAi)*, or *cdk-2(RNAi)* embryos  
521 expressing tDHB-GFP. \*\*\*\*,  $p < 0.0001$  per ordinary one-way ANOVA of the log of  
522 ratios.  $n = 10$  embryos per RNAi treatment.

523 (I-L) Micrograph of (I) a *ced-3(lf)* embryo expressing tDHB-GFP obtained at the  
524 comma stage using confocal microscopy. Magnified views are provided for the  
525 cells extruded at (J) the anterior sensory depression, (K) the ventral pocket, and  
526 (L) the posterior tip of the embryo, with the corresponding regions outlined in (I).  
527 The cell nucleus, as determined by Nomarski optics, is marked by a dotted line  
528 for each extruded cell in the magnified images (J), (K) and (L). The embryo

529 shown carried the transgenes *heSi192* and *nls861*. A, anterior; V, ventral. Scale  
530 bar, 10  $\mu$ m.

531

# Figure 4

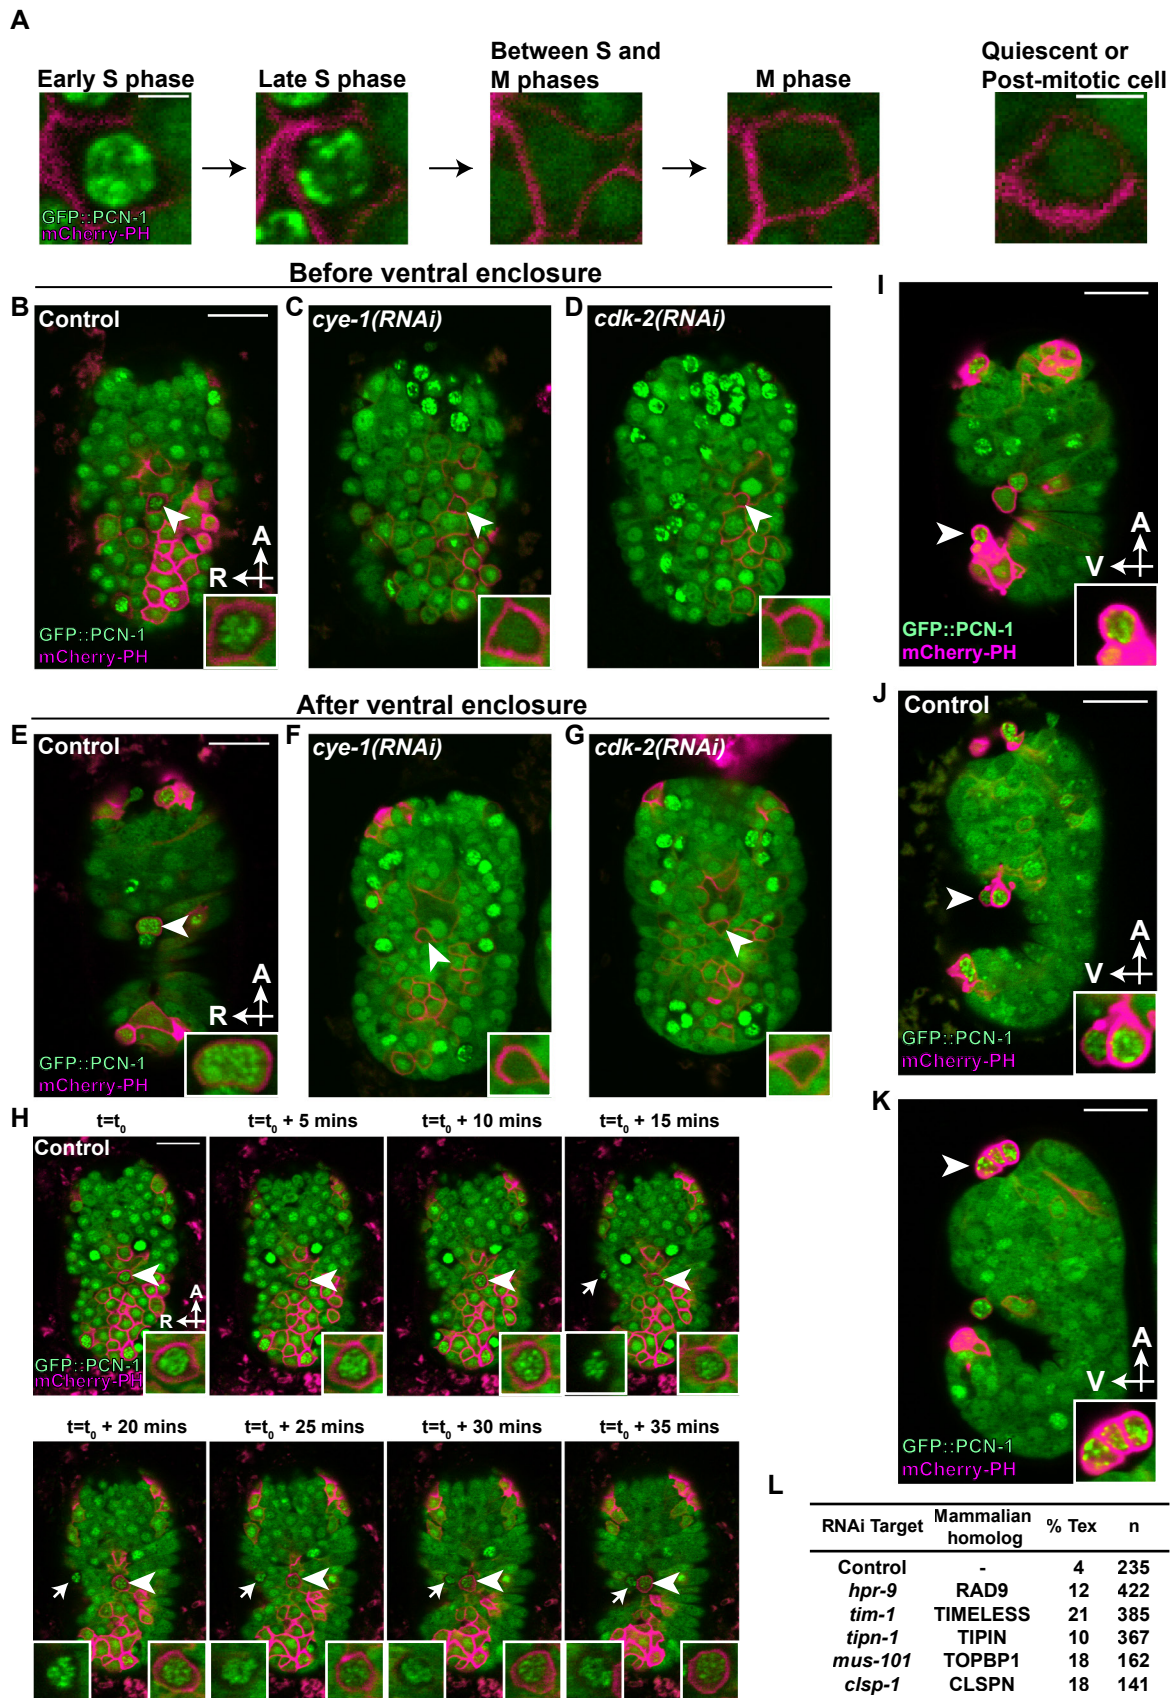

532 **Figure 4 Cells undergoing extrusion arrest in S phase and trigger the DNA**  
533 **replication stress checkpoint**

534 (A) Representative micrographs showing localization patterns of GFP::PCN-1 in  
535 the same cell at different phases of the cell cycle or in a different cell in a post-  
536 mitotic state. The post-mitotic cell shown is ABplpappaaa (future RMEV neuron).  
537 These cells were imaged from a *ced-3(lf)* embryo, which carried the transgenes  
538 *nls861* and *isls17*. Scale bar, 2  $\mu$ m.

539 (B-G) Micrographs of the ventral surface, including ABplpappap (arrowhead), of  
540 *ced-3(lf)* embryos expressing GFP::PCN-1 obtained (B-D) prior to and (E-G) post  
541 ventral enclosure using confocal microscopy in (B,E) control embryos, (C,F) *cye-*  
542 *1(RNAi)* embryos, and (D,G) *cdk-2(RNAi)* embryos. Inset, a magnified view of  
543 ABplpappap. The embryos shown carried the transgenes *nls861* and *isls17*. A,  
544 anterior; R, right. Scale bar, 10  $\mu$ m.

545 (H) Micrographs obtained at 5-min intervals using time-lapse confocal  
546 microscopy show the GFP::PCN-1 localization pattern in ABplpappap  
547 (arrowhead) and another unidentified extruded cell (arrow) as they were  
548 progressively extruded over 35 min in a *ced-3(lf)* embryo with control RNAi. Left  
549 insets, magnified views of unidentified extruded cell; right insets, magnified views  
550 of ABplpappap. The embryo shown carried the transgenes *isls17* and *nls861*.  
551 The decrease in fluorescence intensity can be attributed to bleaching from  
552 repeated imaging over time. A, anterior; R, right. Scale bar, 10  $\mu$ m.

553 (I-K) Micrographs of extruded cells in *ced-3(lf)* embryos expressing GFP::PCN-1  
554 obtained at the comma stage using confocal microscopy show GFP::PCN-1

555 localization in cells at (I) the posterior tip of the embryo (no RNAi), (J) the ventral  
556 pocket (control RNAi), and (K) the anterior sensory depression (no RNAi). Inset,  
557 a magnified view of extruded cells marked by an arrowhead. The embryos shown  
558 carried the transgenes *isIs17* and *nIs861*. A, anterior; V, ventral. Scale bar, 10  
559  $\mu\text{m}$ .

560 (L) Penetrances of the Tex phenotype produced by RNAi-mediated targeting of  
561 replication-stress checkpoint genes *hpr-9*, *tim-1*, *tipn-1*, *mus-101* and *clsp-1* in  
562 *ced-3(lf)* animals. The strain used for scoring the RNAi-induced Tex phenotype  
563 carried the transgene *nIs433*, which expresses nuclear GFP in excretory cell(s).  
564

## Figure 5

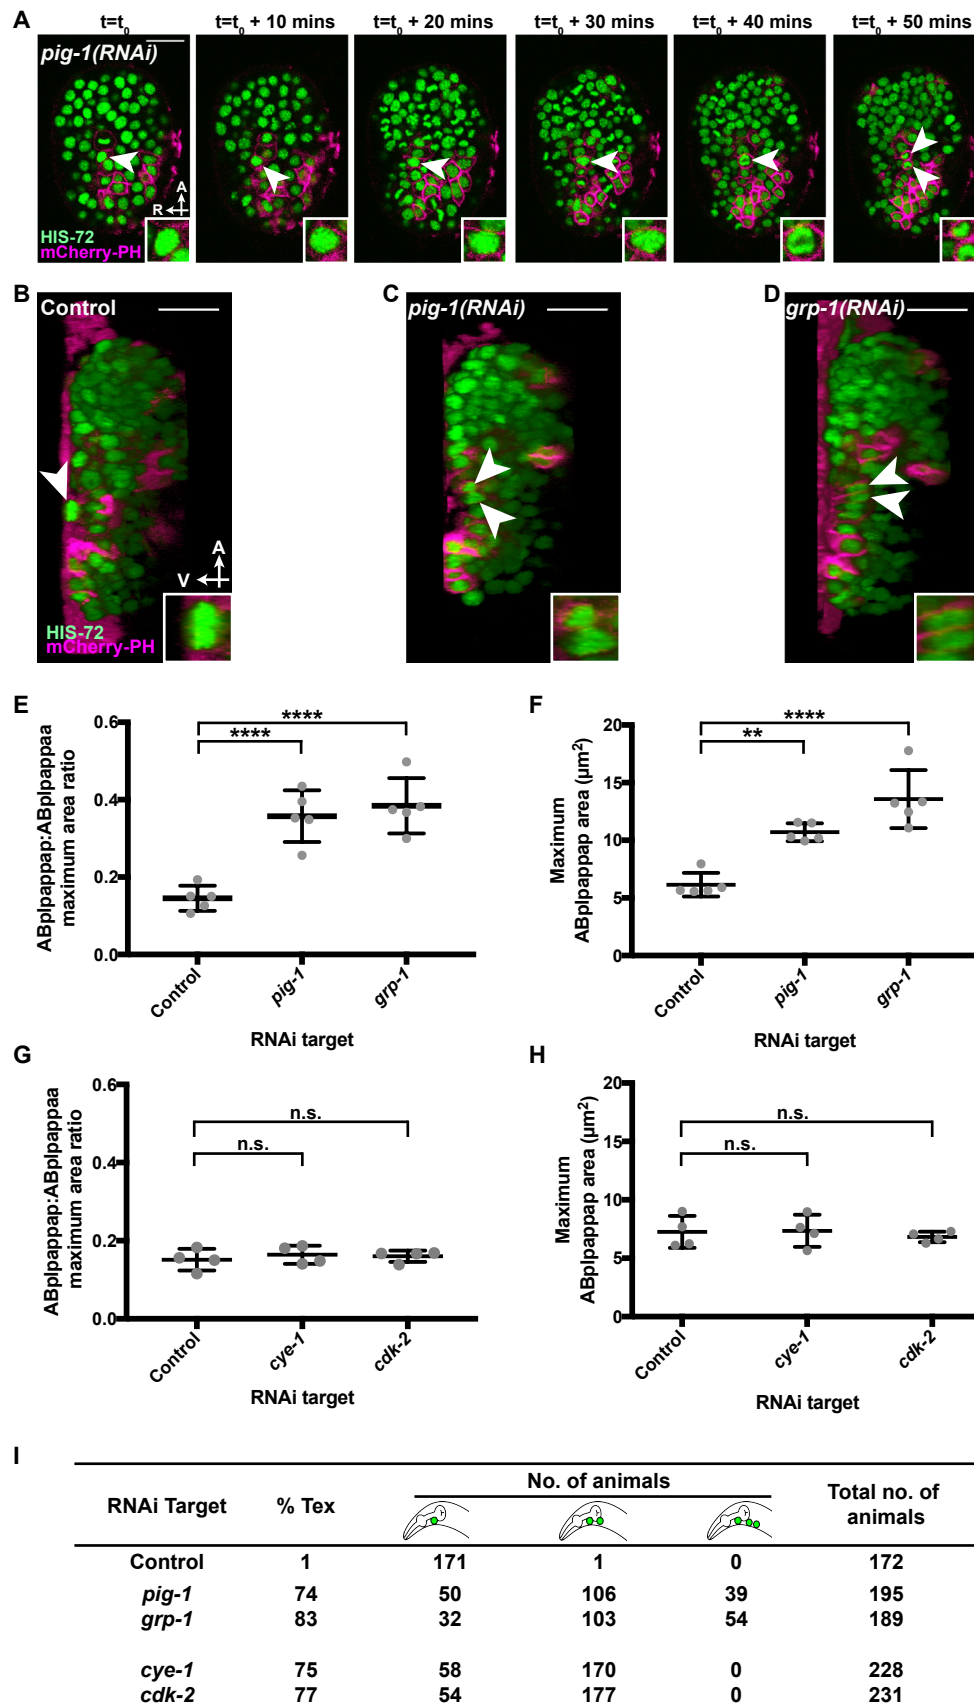



565 **Figure 5 Unequal cell division genes *pig-1* and *grp-1* promote extrusion by**  
566 **preventing cell-cycle progression beyond S phase**

567 (A) Micrographs of a *pig-1(RNAi)* embryo obtained at 10-min intervals over a  
568 period of 50 min using time-lapse confocal microscopy show that an enlarged  
569 ABplpappap divides before ventral enclosure in *pig-1(RNAi)* embryos. The  
570 embryo shown carried the transgenes *stIs10026* and *nIs861*. Inset, a magnified  
571 view of ABplpappap or its descendants. A, anterior; R, right. Scale bar, 10  $\mu$ m.

572 (B-D) Virtual lateral sections of *ced-3(lf)* embryos through ABplpappap (single  
573 arrowhead) or its daughters (two arrowheads) in a (B) control embryo, (C) *pig-*  
574 *1(RNAi)* embryo, and (D) *grp-1(RNAi)* embryo. Inset, a magnified view of  
575 ABplpappap or its descendants. The embryos shown carry the transgenes  
576 *stIs10026* and *nIs861*. A, anterior; V, ventral. Scale bar, 10  $\mu$ m.

577 (E) Ratio of maximum area (see Materials and methods) of ABplpappap to that of  
578 its sister in *ced-3(lf)* embryos with RNAi against control, *pig-1* or *gpr-1*. Error  
579 bars, standard deviation. \*\*\*\*,  $p < 0.0001$  per ordinary one-way ANOVA of log of  
580 ratios.  $n = 5$  embryos for each RNAi treatment.

581 (F) Quantification of the maximum area (see Materials and methods) of  
582 ABplpappap in control embryos, *pig-1(RNAi)* embryos and *grp-1(RNAi)* embryos.  
583 Error bars, standard deviation. \*\*,  $p < 0.01$ ; \*\*\*\*,  $p < 0.0001$  per ordinary one-way  
584 ANOVA.  $n = 5$  embryos for each RNAi treatment.

585 (G) Ratio of maximum area (see Materials and methods) of ABplpappap to that  
586 of its sister in *ced-3(lf)* embryos with RNAi against control, *cye-1* or *cdk-2*. Error

587 bars, standard deviation. n.s., not significant per ordinary one-way ANOVA of log  
588 of ratios. n=4 embryos for each RNAi treatment.

589 (H) Quantification of the maximum area (see Materials and methods) of  
590 ABplpappap in control embryos, *cye-1(RNAi)* embryos and *cdk-2(RNAi)*  
591 embryos. Error bars, standard deviation. n.s., not significant per ordinary one-  
592 way ANOVA. n=4 embryos for each RNAi treatment.

593 (I) Penetrances of the Tex phenotype and number of animals with one, two or  
594 three excretory cells produced by RNAi against genes identified from genetic  
595 screens for defective extrusion. The *ced-3(lf)* strain used for this experiment  
596 carries the transgene *nls433*.

597

## Figure 6

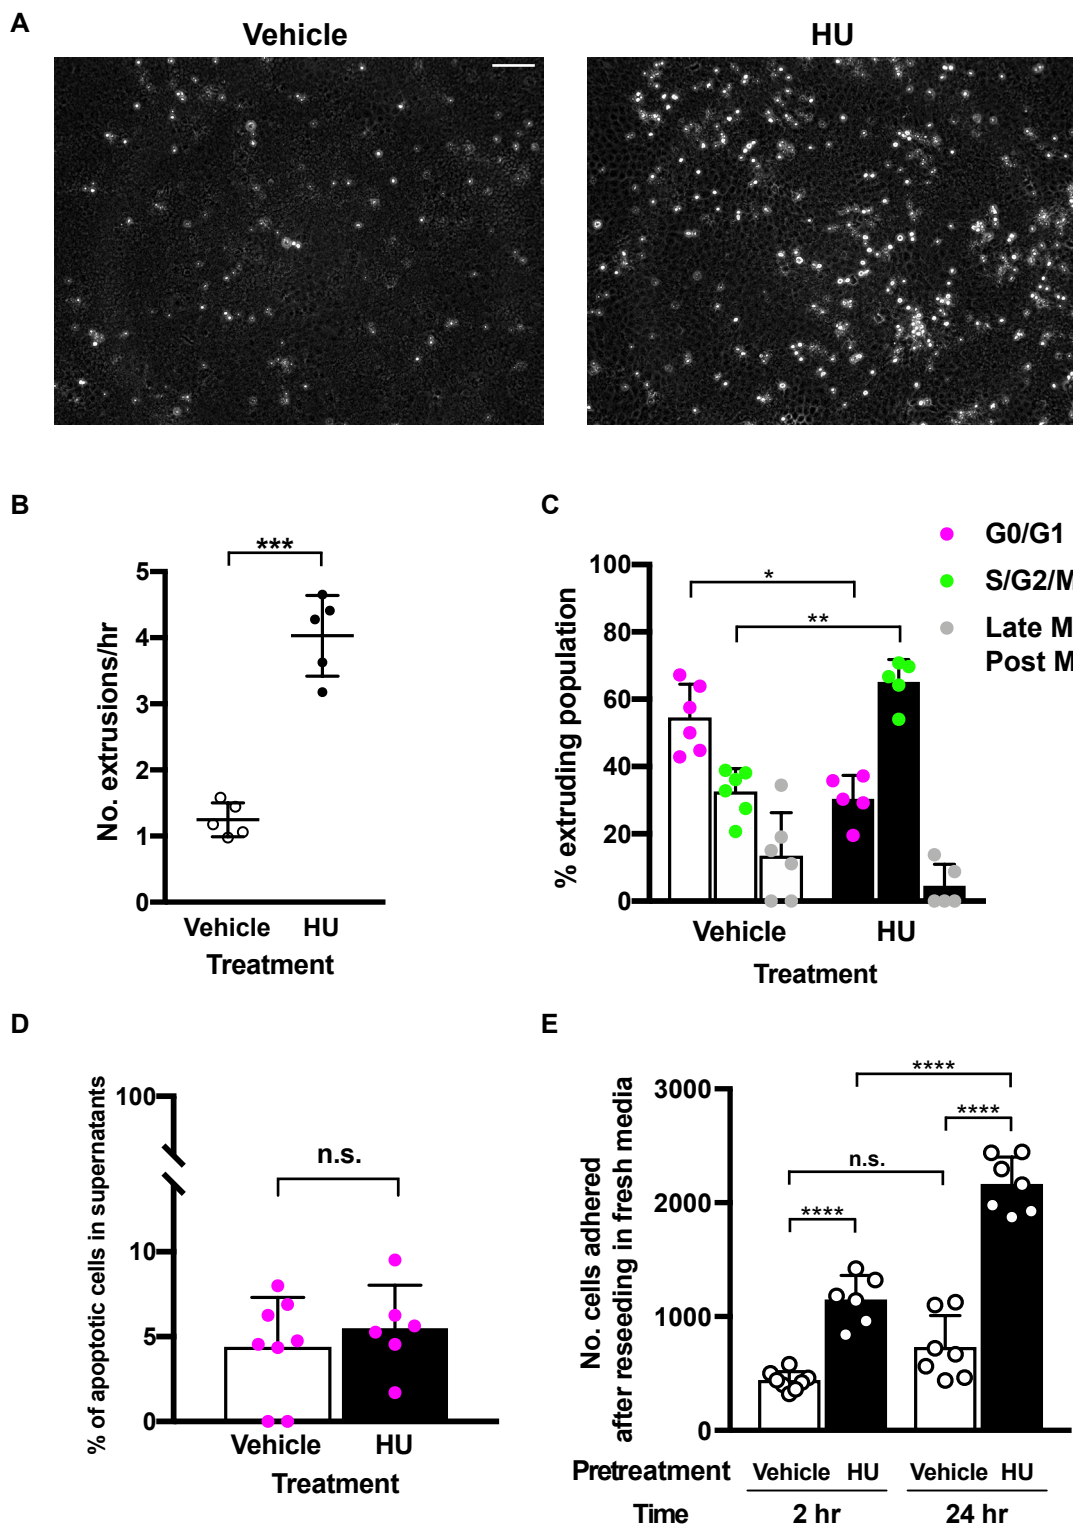

598 **Figure 6 S-phase arrest is sufficient for cell extrusion from a simple**  
599 **mammalian epithelial layer**

600 (A) Representative images from time-lapse videos of mammalian MDCK cell  
601 monolayers exposed to either vehicle or 2 mM hydroxyurea (HU) at 22 h of  
602 exposure. Extruded cells can be identified as bright, white, rounded spots rising  
603 from the epithelial plane. Many more extruded cells are observed after HU  
604 treatment as compared to vehicle treatment. Scale bar, 100  $\mu$ m.

605 (B) Graph showing average number of cell extrusions per h in vehicle-treated  
606 and 2 mM HU-treated MDCK monolayers. Each data point represents a separate  
607 experiment conducted for up to 24 h normalized by duration of experiment for  
608 comparison. Error bars, standard deviation. \*\*\*,  $p < 0.001$  per Welch's two-tailed  
609 t-test.  $n=5$  measurements experimental replicates for each condition.

610 (C) Graph showing cell cycle phase distribution of extruded MDCK-FUCCI cells  
611 after HU treatment or vehicle treatment. Each data point represents a separate  
612 experiment. Error bars, standard deviation. \*,  $p < 0.05$ ; \*\*,  $p < 0.01$  per Kruskal-  
613 Wallis test.

614 (D) Graph showing percentage of cells extruded after vehicle treatment or HU  
615 treatment that are apoptotic as per Trypan blue uptake. Each data point  
616 represents a separate experiment. Error bars, standard deviation. n.s., not  
617 significant per Mann-Whitney test.

618 (E) Graph showing the number of HU-treated or vehicle-treated extruded cells  
619 that adhered at 2 h and 24 h after reseeding in fresh media. Each data point

620 represents a separate experiment. Error bars, standard deviation. n.s., not  
621 significant; \*\*\*\*,  $p < 0.0001$  per standard one-way ANOVA.  
622

# Figure 7

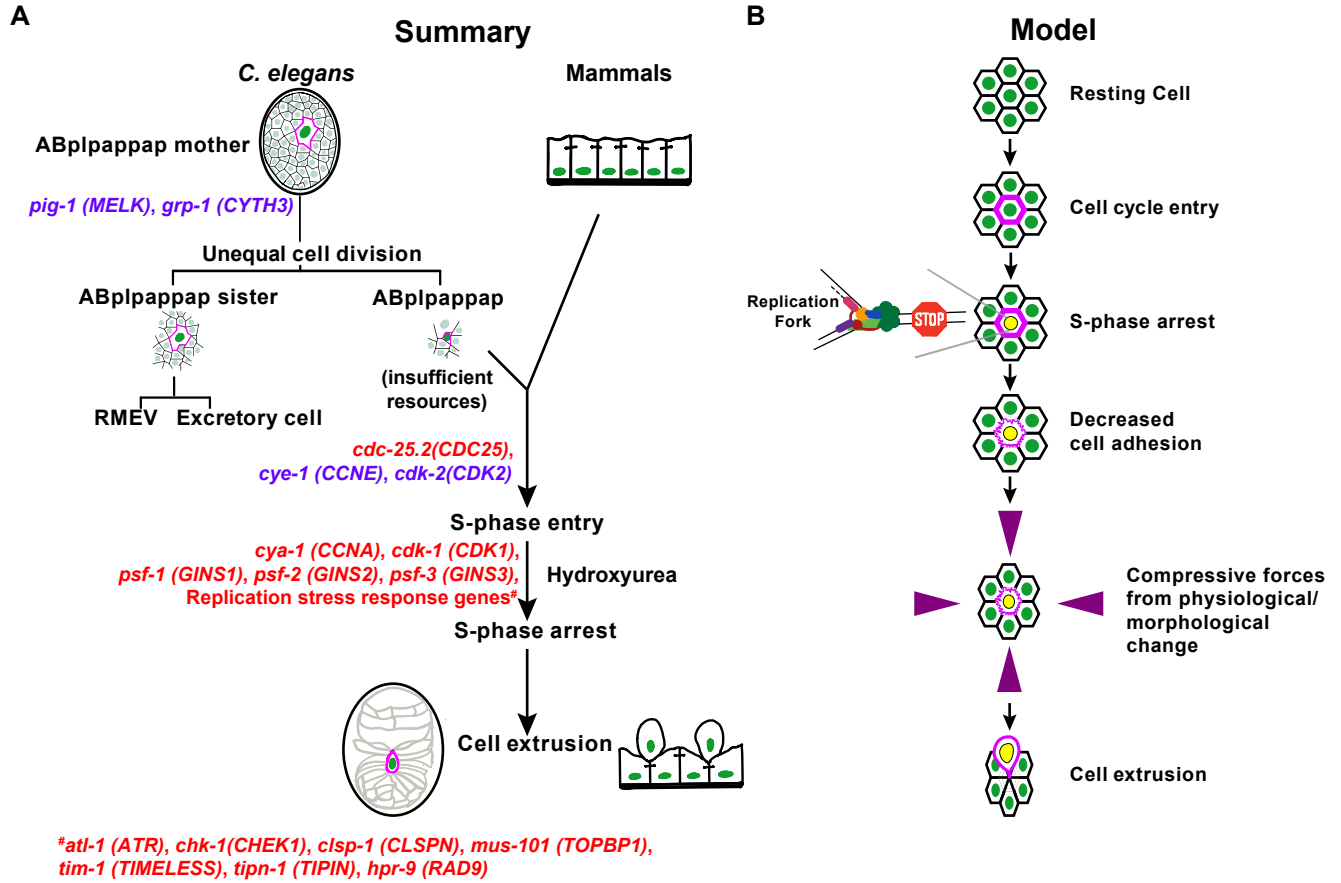

623 **Figure 7 Summary and Model: S-phase arrest drives cell extrusion**

624 (A) A summary of the genes required for cell extrusion by *C. elegans*, their  
625 mammalian homologs (in parentheses) and their associated biological processes  
626 that precede the S-phase arrest that drives the cell extrusion of ABplpappap (and  
627 other extruded cells) from *C. elegans* embryos. Treatment of mammalian cells  
628 (MDCK) with HU chemically produces an S-phase arrest in cells that drives their  
629 extrusion from simple epithelial layers, as shown. At each step preceding cell  
630 extrusion by *C. elegans*, genes with function we demonstrated to occur at the  
631 corresponding step are shown in purple, and genes with probable function at that  
632 step are shown in red. Relevant cells in the *C. elegans* embryos are outlined in  
633 magenta. The horizontal hyphen-like lines connecting mammalian cells indicate  
634 adhesion junctions.

635 (B) Model: A cell that enters the cell cycle (marked by magenta cell boundary)  
636 but arrests in S phase (marked by yellow nucleus) will have lowered cell  
637 adhesion (marked by wavy magenta cell boundary). When a cell with lowered  
638 cell adhesion caused by S-phase arrest experiences morphological or  
639 physiological forces (marked by purple arrows) that cause a squeezing-like  
640 effect, the cell gets extruded.

641

# Supplemental Table 1

| RNAi target            | Mammalian Homolog | %Tex | n   | extensive lethality? | RNAi target          | Mammalian Homolog | %Tex | n   | extensive lethality? |
|------------------------|-------------------|------|-----|----------------------|----------------------|-------------------|------|-----|----------------------|
| empty vector           | -                 | 1    | 159 | N                    | <i>cic-1</i>         | CCNC              | 1    | 158 | N                    |
| <b><i>atl-1</i></b>    | ATR               | 10   | 509 | N                    | <i>cyd-1</i>         | CCND              | 0    | 111 | N                    |
| <i>cdc-14</i>          | CDC14             | 1    | 168 | N                    | <b><i>cye-1</i></b>  | CCNE              | 89   | 133 | Y                    |
| <i>cdc-25.1</i>        | CDC25             | 0    | 111 | Y                    | <i>cyh-1</i>         | CCNH              | 0    | 119 | Y                    |
| <b><i>cdc-25.2</i></b> | CDC25             | 12   | 159 | N                    | <i>cyl-1</i>         | CCNL              | 1    | 106 | Y                    |
| <i>cdc-25.3</i>        | CDC25             | 2    | 168 | N                    | <i>cyy-1</i>         | CCNY              | 1    | 108 | N                    |
| <i>cdc-25.4</i>        | CDC25             | 0    | 183 | N                    | <i>dpl-1</i>         | TFDP1             | 0    | 167 | N                    |
| <b><i>cdk-1</i></b>    | CDK1              | 15   | 61  | Y                    | <i>efl-1</i>         | E2F               | 0    | 141 | N                    |
| <i>cdk-11.1</i>        | CDK11             | 0    | 175 | N                    | <i>emb-27</i>        | CDC16             | 0    | 107 | Y                    |
| <i>cdk-11.2</i>        | CDK11             | 1    | 132 | N                    | <i>emb-30</i>        | ANAPC4            | 0    | 130 | Y                    |
| <i>cdk-12</i>          | CDK12             | 0    | 167 | N                    | <i>fzr-1</i>         | FZR1              | 1    | 146 | N                    |
| <b><i>cdk-2</i></b>    | CDK2              | 65   | 181 | N                    | <i>fzy-1</i>         | CDC20             | 0    | 130 | Y                    |
| <i>cdk-4</i>           | CDK4              | 1    | 193 | N                    | <i>hpr-17</i>        | RAD17             | 5    | 214 | N                    |
| <i>cdk-5</i>           | CDK5              | 0    | 155 | N                    | <i>hus-1</i>         | HUS1              | 0    | 132 | N                    |
| <i>cdk-7</i>           | CDK7              | 0    | 130 | Y                    | <i>lin-15</i>        | -                 | 1    | 104 | N                    |
| <i>cdk-8</i>           | CDK8              | 1    | 186 | N                    | <b><i>lin-23</i></b> | βTrCP             | 23   | 147 | N                    |
| <i>cdk-9</i>           | CDK9              | 1    | 155 | Y                    | <i>lin-35</i>        | Rb                | 0    | 134 | N                    |
| <i>cdt-1</i>           | CDT1              | 1    | 147 | Y                    | <i>lin-36</i>        | -                 | 0    | 111 | N                    |
| <b><i>chk-1</i></b>    | CHEK1             | 10   | 164 | Y                    | <i>lin-9</i>         | LIN9              | 1    | 125 | N                    |
| <i>cit-1.1</i>         | CCNT1/2           | 0    | 105 | N                    | <i>mat-1</i>         | CDC27             | 0    | 80  | Y                    |
| <i>cit-1.2</i>         | CCNT1/2           | 1    | 244 | N                    | <i>mat-2</i>         | ANAPC1            | 1    | 163 | Y                    |
| <i>cki-1</i>           | CDKN1             | 0    | 125 | N                    | <i>mat-3</i>         | CDC23             | 0    | 108 | Y                    |
| <i>cki-2</i>           | CDKN1             | 1    | 216 | N                    | <i>mdf-1</i>         | MAD1L1            | 3    | 112 | N                    |
| <i>clk-2</i>           | TELO2             | 1    | 156 | N                    | <i>mdf-2</i>         | MAD2L1            | 1    | 111 | N                    |
| <i>cul-1</i>           | CUL1              | 5    | 81  | Y                    | <i>mrt-2</i>         | RAD1              | 0    | 114 | N                    |
| <i>cul-2</i>           | CUL2              | 0    | 21  | Y                    | <i>rnr-1</i>         | RRM1              | 5    | 103 | Y                    |
| <i>cul-3</i>           | CUL3              | 5    | 151 | Y                    | <i>san-1</i>         | BUB1B             | 1    | 145 | N                    |
| <i>cul-4</i>           | CUL4              | 0    | 141 | N                    | <i>wee-1.1</i>       | PKMYT1            | 1    | 159 | N                    |
| <b><i>cya-1</i></b>    | CCNA              | 20   | 309 | N                    | <i>wee-1.3</i>       | PKMYT1            | 0    | 60  | Y                    |
| <i>cyb-1</i>           | CCNB1             | 4    | 136 | N                    |                      |                   |      |     |                      |
| <i>cyb-2.1</i>         | CCNB2             | 1    | 102 | N                    |                      |                   |      |     |                      |
| <i>cyb-2.2</i>         | CCNB2             | 0    | 144 | N                    |                      |                   |      |     |                      |
| <i>cyb-3</i>           | CCNB3             | 14   | 7   | Y                    |                      |                   |      |     |                      |



642 **Supplemental Table 1 Penetrance of the Tex phenotype produced by RNAi**  
643 **against cell cycle genes (and non-cell-cycle cyclins and CDKs) in *ced-3(lf)***  
644 **animals.** Tex penetrance produced by each of the RNAi clones in the cell-cycle  
645 RNAi library, the number of animals counted for each RNAi clone and whether or  
646 not the RNAi clone produced extensive lethality are shown. Genes corresponding  
647 to RNAi clones that produced more than 9% penetrance of the Tex phenotype  
648 are in bold. *cyb-3* did not fit this criterion, as extensive lethality prevented the  
649 counting of sufficient number of animals to assign significance. Some cyclins and  
650 CDKs that function outside the cell cycle were included in this library and served  
651 as negative controls.  
652

## Supplemental Table 2

| RNAi target     | Mammalian Homolog | %Tex | n   |
|-----------------|-------------------|------|-----|
| empty vector    | -                 | 0    | 127 |
| <i>atl-1</i>    | ATR               | 0    | 198 |
| <i>cdc-25.2</i> | CDC25             | 0    | 36  |
| <i>cdk-1</i>    | CDK1              | 0    | 51  |
| <i>cdk-2</i>    | CDK2              | 0    | 237 |
| <i>chk-1</i>    | CHK1              | 0    | 115 |
| <i>csn-1</i>    | GPS1              | 0    | 156 |
| <i>csn-4</i>    | COPS4             | 0    | 141 |
| <i>csn-5</i>    | COPS5             | 0    | 114 |
| <i>cya-1</i>    | CCNA              | 0    | 167 |
| <i>cye-1</i>    | CCNE              | 0    | 143 |
| <i>lin-23</i>   | $\beta$ TrCP      | 12   | 96  |
| <i>psf-1</i>    | GINS1             | 0    | 150 |
| <i>psf-2</i>    | GINS2             | 0    | 190 |
| <i>psf-3</i>    | GINS3             | 0    | 72  |

653 **Supplemental Table 2 Penetrance of the Tex phenotype produced in wild-**  
654 **type animals by RNAi against cell cycle genes with potential roles in cell**  
655 **extrusion.** The Tex penetrance produced in wild-type animals by RNAi clones  
656 against cell cycle genes that might be involved in cell extrusion (based on the  
657 corresponding Tex penetrance in *ced-3(lf)* animals) is provided. *Bona fide*  
658 candidates for cell extrusion regulation should not produce a Tex phenotype in  
659 wild-type animals, as cell extrusion does not occur in wild-type worms. A Tex  
660 phenotype in wild-type animals could occur from other effects of RNAi against  
661 cell cycle genes, such as excessive proliferation leading to multiple excretory  
662 cells. Such proliferation is likely the case for *lin-23*, as RNAi against *lin-23* has  
663 been previously described to cause excessive proliferation (Kipreos *et al.*, 2000).  
664 The 13 other genes are good candidates to be regulators of cell extrusion by the  
665 criterion of dependence of the Tex phenotype on the loss of function of *ced-3*.

## Supplemental Figure 1

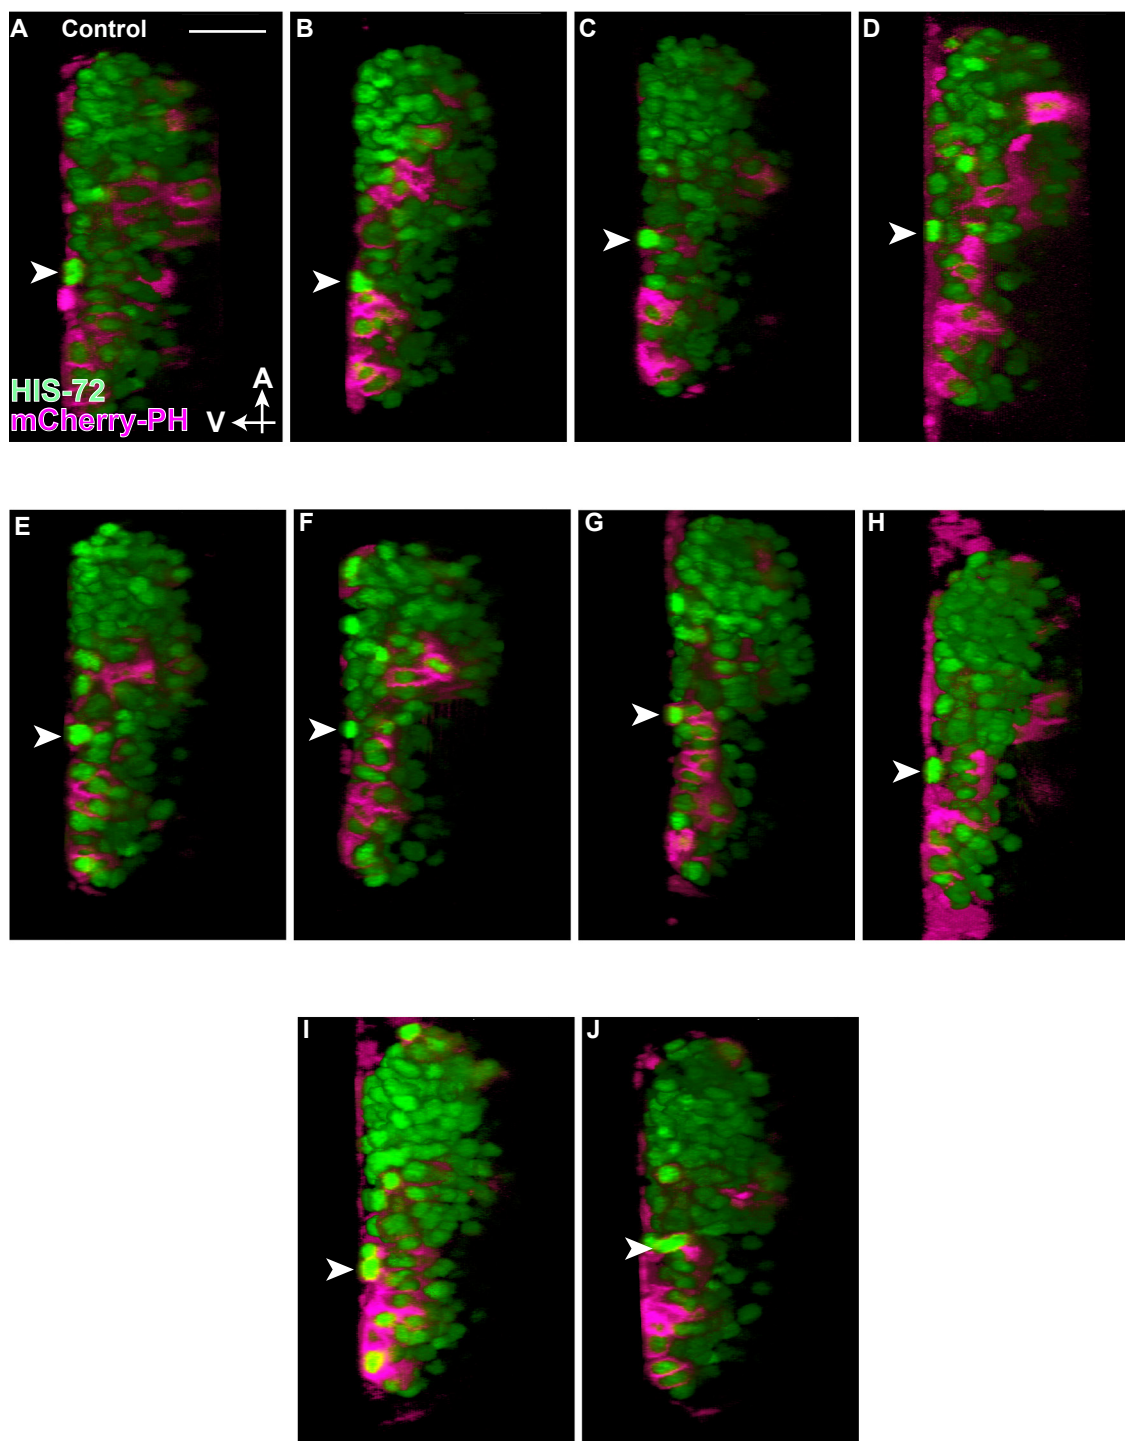

666 **Supplemental Figure 1 ABplpappap is extruded by control embryos**

667 (A-J) Virtual lateral sections of embryos through the ABplpappap cell (arrowhead)  
668 in (A-J) 10 control embryos show (A-I) ABplpappap is extruded in 9 of 10  
669 embryos and (J) is not extruded in 1 of 10 embryos. The embryos shown carry  
670 the transgenes *stls10026* and *nls861*. A, anterior; V, ventral. Scale bar, 10  $\mu$ m.

671

## Supplemental Figure 2

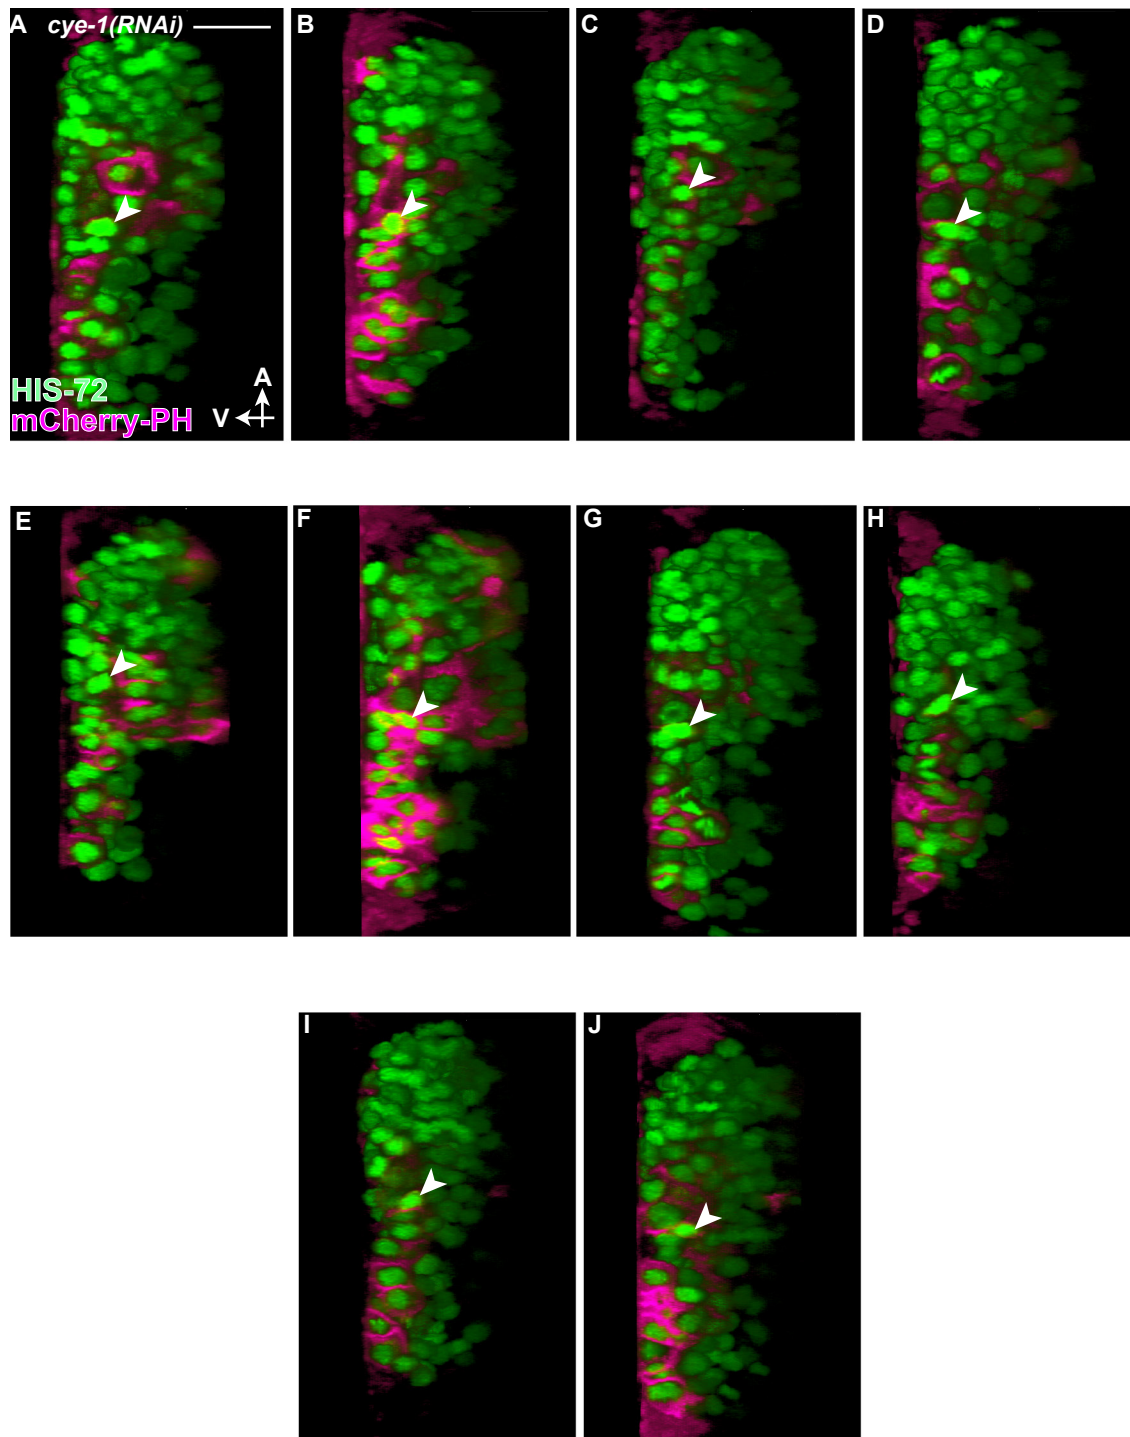

672 **Supplemental Figure 2 ABplpappap is not extruded by *cye-1(RNAi)***

673 **embryos**

674 (A-J) Virtual lateral sections of embryos through the ABplpappap cell (arrowhead)

675 in (A-J) 10 *cye-1(RNAi)* embryos show that ABplpappap is not extruded in 10 of

676 10 embryos. The embryos shown carry the transgenes *stIs10026* and *nIs861*. A,

677 anterior; V, ventral. Scale bar, 10  $\mu$ m.

678

## Supplemental Figure 3

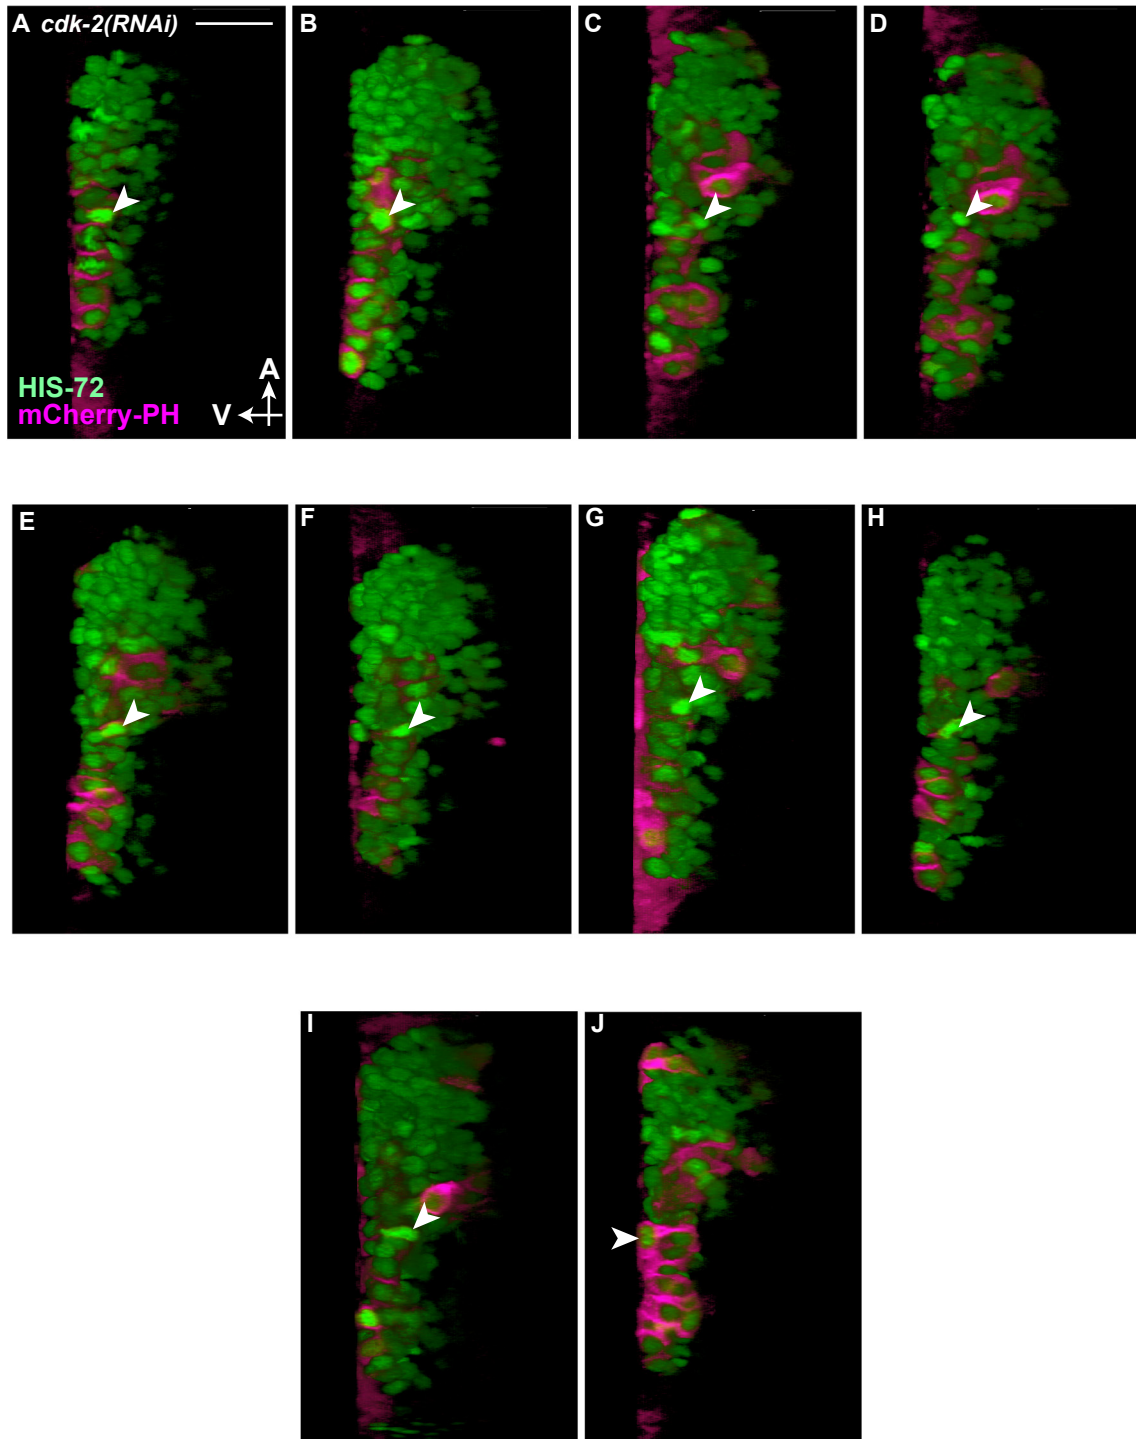



679 **Supplemental Figure 3 ABplpappap is not extruded by *cdk-2(RNAi)***

680 **embryos**

681 (A-J) Virtual lateral sections of embryos through the ABplpappap cell (arrowhead)

682 in (A-J) 10 *cdk-2(RNAi)* embryos show that (A-I) ABplpappap is not extruded in 9

683 of 10 embryos and (J) is extruded in 1 of 10 embryos. The embryos shown carry

684 the transgenes *stls10026* and *nls861*. A, anterior; V, ventral. Scale bar, 10  $\mu$ m.

685

## Supplemental Figure 4

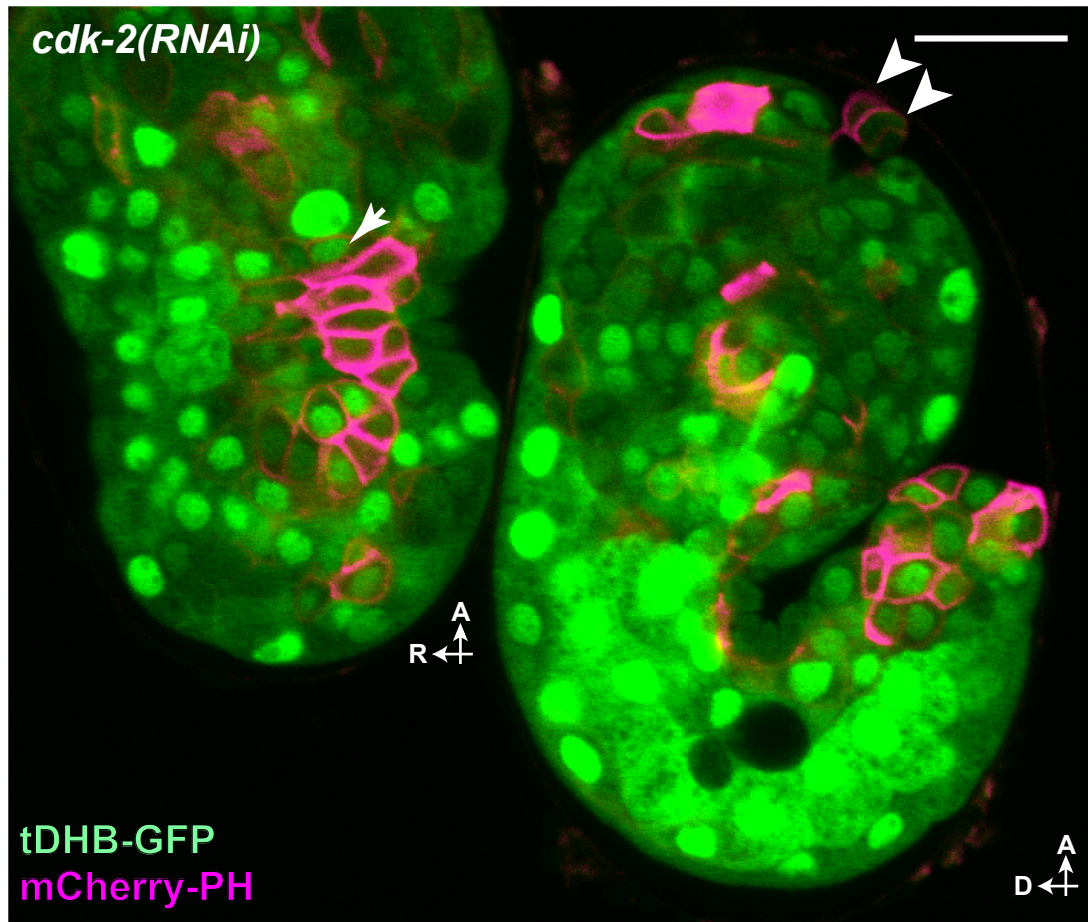

686 **Supplemental Figure 4 Cells extruded by *cdk-2(RNAi)* embryos enter the**  
687 **cell cycle**

688 Micrograph of two *cdk-2(RNAi)* embryos expressing tDHB-GFP shows a nuclear-  
689 enriched localization of tDHB-GFP in an ABplpappap cell (arrow) that was not  
690 extruded by the first embryo but presumably nuclear-depleted tDHB-GFP in two  
691 cells that were extruded from the second embryo (arrowheads). The embryos  
692 shown carry the transgenes *heSi192* and *nls861*. A, anterior; D, dorsal; R, right.  
693 Scale bar, 10  $\mu$ m.

694

## Supplemental Figure 5

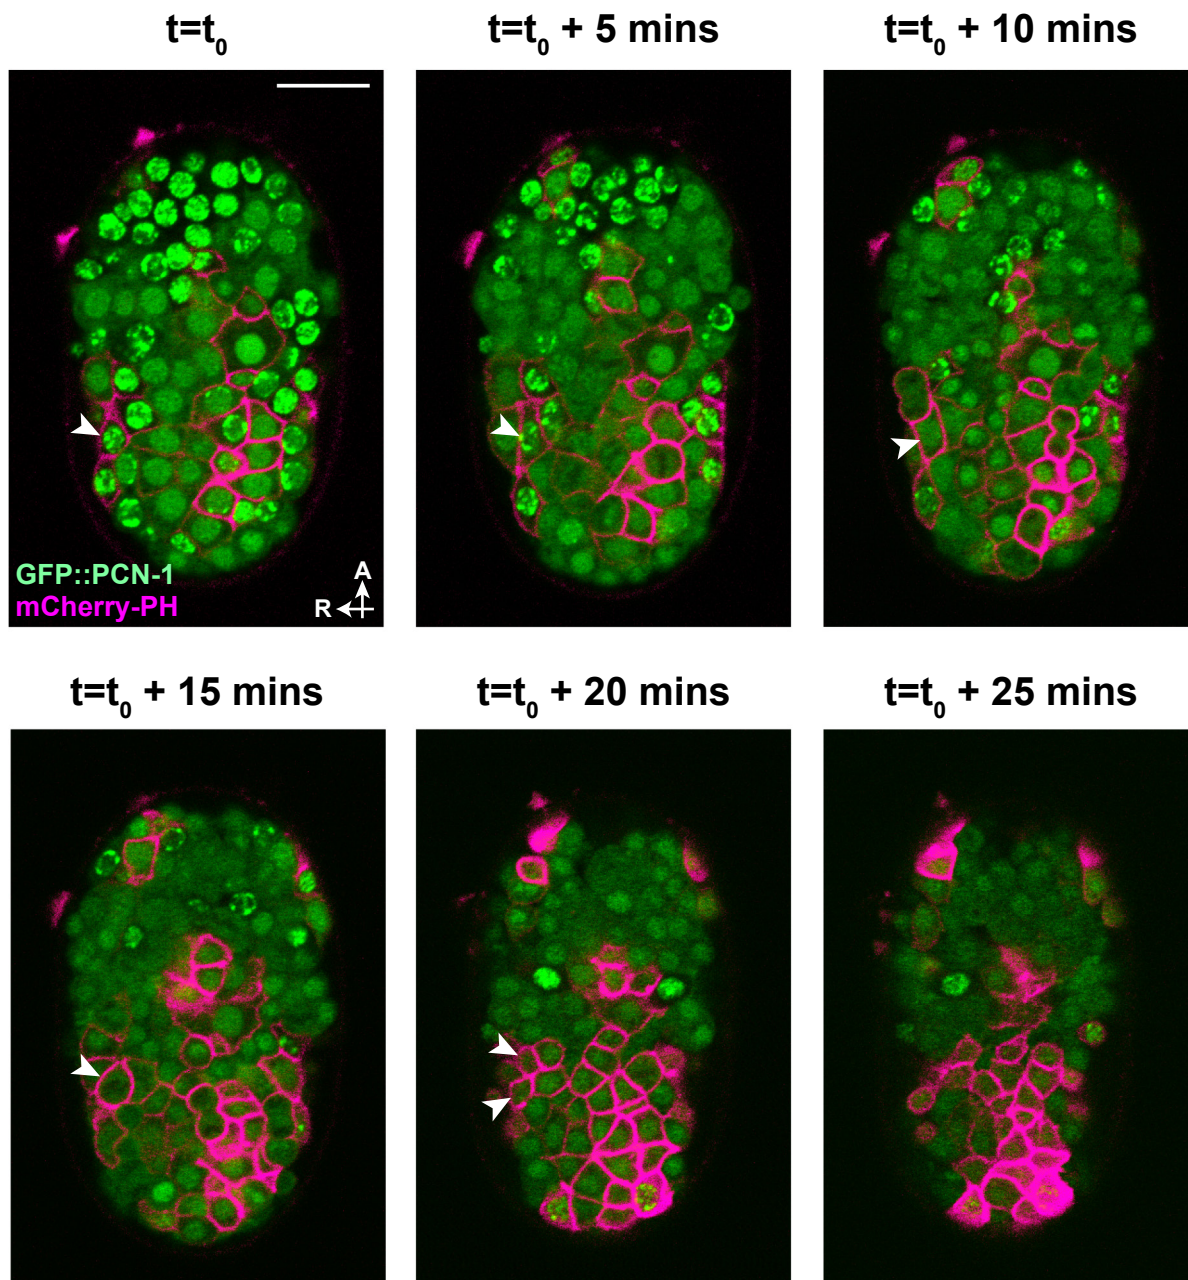

695 **Supplemental Figure 5 GFP::PCN-1 exhibits a localization pattern**

696 **coordinated with the cell cycle in embryonic cells on the ventral surface**

697 Time-lapse confocal micrographs of a *ced-3(lf)* embryo obtained at 5-min

698 intervals show the dynamics of GFP::PCN-1 localization in multiple cells on the

699 ventral surface of the embryo. Arrowheads mark a cell that is shown undergoing

700 a complete cell cycle. The embryo shown carries the transgenes *is/s17* and

701 *nls861*. A, anterior; R, right. Scale bar, 10  $\mu$ m.

702

## Supplemental Figure 6

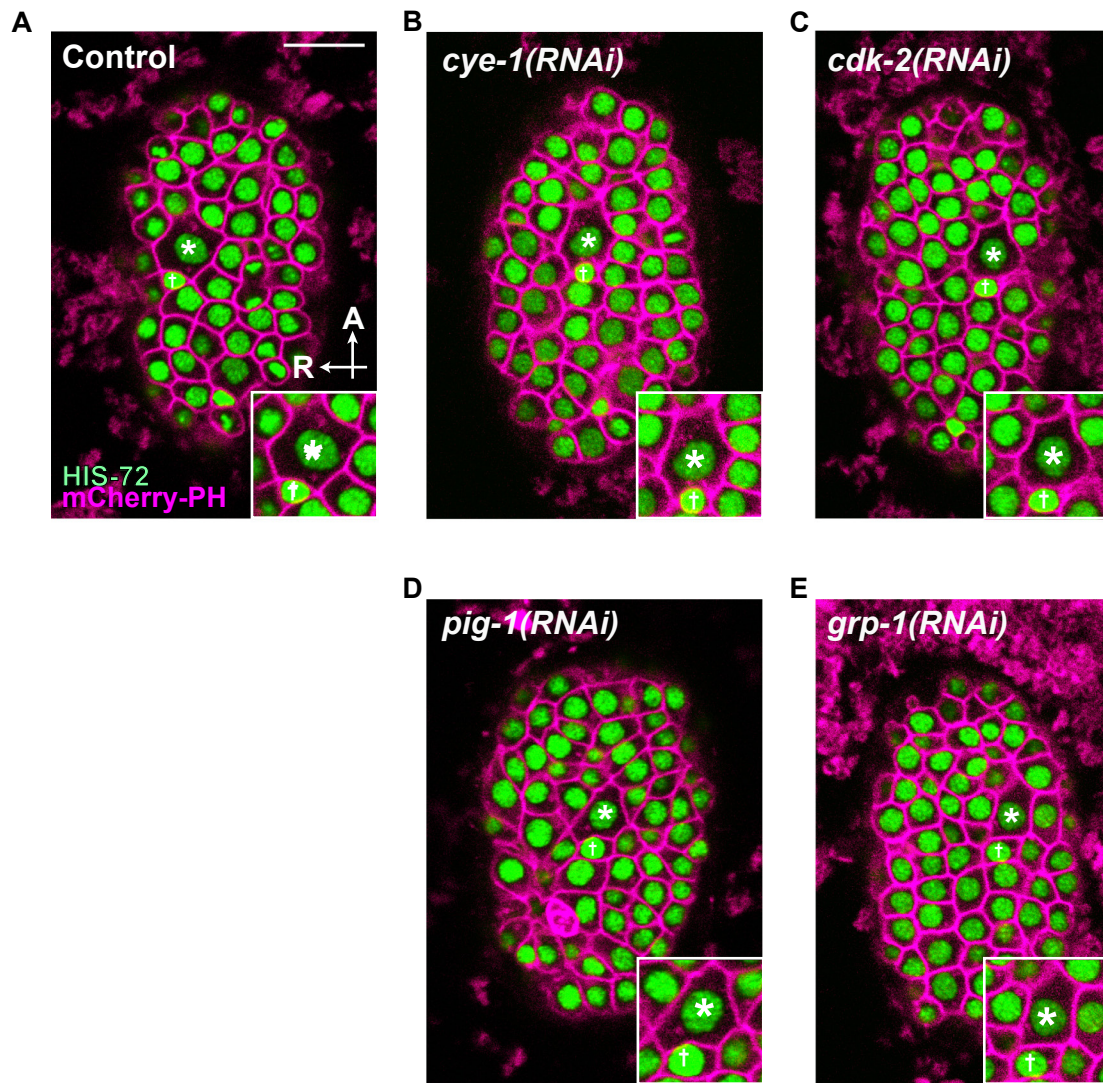

703 **Supplemental Figure 6 ABplpappa undergoes unequal cell division**  
704 **controlled by *pig-1* and *grp-1* but independent of *cye-1* and *cdk-2***

705 Micrographs of *ced-3(lf)* embryos expressing nuclear GFP and membrane-  
706 localized mCherry in all cells obtained using confocal microscopy show the  
707 relative sizes of ABplpappap (†) and its sister, ABplpappaa (\*) in a (A) control  
708 embryo, (B) *cye-1(RNAi)* embryo, (C) *cdk-2(RNAi)* embryo, (D) *pig-1(RNAi)*  
709 embryo and (E) *grp-1(RNAi)* embryo. Inset, a magnified view of ABplpappap(†)  
710 and its sister, ABplpappaa(\*). All embryos shown carried the transgenes  
711 *stIs10026* and *ItIs44[P<sub>pie-1</sub>::mCherry::PH]*, which expresses membrane-localized  
712 mCherry in all cells. A, anterior; R, right. Scale bar, 10 μm.

713

714

715 **Supplemental Movies**

716 **Movie 1 Control embryos extrude ABplpappap as it undergoes ventral**  
717 **enclosure**

718 Time-lapse video of a *ced-3(lf); control(RNAi)* embryo undergoing ventral  
719 enclosure over a period of 50 minutes shows ABplpappap (circled at the  
720 beginning and end of video) was extruded from this embryo. All nuclei are  
721 labeled with GFP and membranes of *egl-1*–expressing cells are labeled with  
722 mCherry (magenta). Time-lapse images used for this video were obtained using  
723 confocal microscopy. Video playback is at 600x real speed. The embryo shown  
724 carried the transgenes *stIs10026* and *nIs632*.

725 **Movie 2 *cye-1(RNAi)* embryos do not extrude ABplpappap as it undergoes**  
726 **ventral enclosure**

727 Time-lapse video of a *ced-3(lf); cye-1(RNAi)* embryo undergoing ventral  
728 enclosure over a period of 50 minutes shows ABplpappap (circled at the  
729 beginning and end of video) was not extruded from this embryo. All nuclei are  
730 labeled with GFP and membranes of *egl-1*–expressing cells are labeled with  
731 mCherry (magenta). Time-lapse images used for this video were obtained using  
732 confocal microscopy. Video playback is at 600x real speed. The embryo shown  
733 carried the transgenes *stIs10026* and *nIs632*.

734 **Movie 3 *cdk-2(RNAi)* embryos do not extrude ABplpappap as it undergoes**  
735 **ventral enclosure**

736 Time-lapse video of a *ced-3(lf); cdk-2 (RNAi)* embryo undergoing ventral  
737 enclosure over a period of 50 minutes shows ABplpappap (circled at the



738 beginning and end of video) was not extruded from this embryo. All nuclei are  
739 labeled with GFP and membranes of *egl-1*-expressing cells are labeled with  
740 mCherry (magenta). Time-lapse images used for this video were obtained using  
741 confocal microscopy. Video playback is at 600x real speed. The embryo shown  
742 carried the transgenes *stIs10026* and *nIs632*.

743 **Movie 4 GFP::PCN-1 shows continuous change in fluorescence intensity**  
744 **during embryonic cell cycles**

745 Time-lapse video of a *ced-3(lf)* embryo expressing GFP::PCN-1 in all cells shows  
746 continuous change in GFP::PCN-1 fluorescence intensity as cells progress  
747 through the cell cycle, similar to that observed for early embryonic cell cycles  
748 (Brauchle *et al.*, 2003). Membranes of *egl-1*-expressing cells are labeled with  
749 mCherry (magenta). Time-lapse images used for this video were obtained using  
750 confocal microscopy. Video playback is at 180x real speed. The embryo shown  
751 carried the transgenes *isIs17* and *nIs861*.

752 **Movie 5 ABplpappap divides before ventral enclosure and is not extruded**  
753 **in *pig-1(RNAi)* embryos**

754 Time-lapse video of a *ced-3(lf); pig-1 (RNAi)* embryo undergoing ventral  
755 enclosure over a period of 57 minutes shows ABplpappap (circled at the  
756 beginning) divided to generate daughters (circled at the end of video) before  
757 ventral enclosure was complete in this embryo. All nuclei are labeled with GFP  
758 and membranes of *egl-1*-expressing cells are labeled with mCherry (magenta).  
759 Time-lapse images used for this video were obtained using confocal microscopy.

760 Video playback is at 600x real speed. The embryo shown carried the transgenes  
761 *stls10026* and *nls861*.

762 **Movie 6 A few cells are extruded from a vehicle-treated MDCK monolayer**

763 A time-lapse video of mammalian MDCK monolayer treated with vehicle control  
764 for 21.25 h shows that a few cells are extruded during this period. Extruded cells  
765 can be identified as bright, white, rounded spots rising from the epithelial plane.  
766 Video playback is at 7200x real speed. Scale bar, 100  $\mu\text{m}$ .

767 **Movie 7 A large number of cells are extruded from an HU-treated MDCK**  
768 **monolayer**

769 A time-lapse video of mammalian MDCK monolayer exposed to HU for 21.25 h  
770 shows that many more cells are extruded during this period as a result of HU  
771 treatment. Extruded cells can be identified as bright, white, rounded spots rising  
772 from the epithelial plane. Video playback is at 7200x real speed. Scale bar, 100  
773  $\mu\text{m}$ .

## KEY RESOURCES TABLE

| REAGENT or RESOURCE                                                                                     | SOURCE              | IDENTIFIER |
|---------------------------------------------------------------------------------------------------------|---------------------|------------|
| Antibodies                                                                                              |                     |            |
| Bacterial and Virus Strains                                                                             |                     |            |
| <i>C. elegans</i> and <i>E. coli</i> strains                                                            | This paper          | Table S4   |
| Biological Samples                                                                                      |                     |            |
| Chemicals, Peptides, and Recombinant Proteins                                                           |                     |            |
| Chemical: Isopropyl- $\beta$ -D-thiogalactopyranoside                                                   | Amresco             | Cat#0487   |
| Chemical: Hydroxyurea                                                                                   | Millipore Sigma     | Cat#H8627  |
| Critical Commercial Assays                                                                              |                     |            |
| In-Fusion HD Cloning Assays                                                                             | TaKaRa              | Cat#639637 |
| QuikChange Site-Directed Mutagenesis Kit                                                                | Agilent             | Cat#200515 |
| Phusion High-Fidelity DNA Polymerase                                                                    | New England Biolabs | Cat#M0530L |
| Q5 Hot Start High-Fidelity DNA Polymerase                                                               | New England Biolabs | Cat#M0439L |
| Deposited Data                                                                                          |                     |            |
| Experimental Models: Cell Lines                                                                         |                     |            |
| Experimental Models: Organisms/Strains                                                                  |                     |            |
| <i>C. elegans</i> and <i>E. coli</i> strains                                                            | This Paper          | Table S4   |
| Oligonucleotides                                                                                        |                     |            |
| Forward primer to amplify <i>egl-1</i> promoter:<br>CGCctgcagTTGAAATTTGGGGATATTTTGG                     | This Paper          | DPD660     |
| Reverse primer to amplify <i>egl-1</i> promoter:<br>CGCgagctcCTGGAAATTAGTAAGGTTTTGAAGGGGG               | This Paper          | DPD661     |
| Forward primer to amplify mCherry PLC-1 $\delta$ PH domain:<br>CGCaccggtCCAGATGGCTCAAACAAAGC            | This Paper          | DPD647     |
| Reverse primer to amplify mCherry PLC-1 $\delta$ PH domain:<br>CGCgaattcGGACAAGTTCATTACAGG              | This Paper          | DPD648     |
| Forward primer to remove NLS sequence:<br>ggagctcAGAAAAAATGGTCTCAAAGGGTG                                | This Paper          | DPD695     |
| Reverse primer to remove NLS sequence:<br>CACCTTTGAGACCATTTTTTCTgagctcc                                 | This Paper          | DPD696     |
| Forward primer to amplify <i>atl-1</i> genomic region for RNAi:<br>TCGAATTCCTGCAGCTCCTCGAACCCATCATCCCT  | This Paper          | RD105      |
| Reverse primer to amplify <i>atl-1</i> genomic region for RNAi:<br>TGACGCGTGGATCCCATGAAGCTGCGTGGTTGTTG  | This Paper          | RD106      |
| Forward primer to amplify <i>mat-2</i> genomic region for RNAi:<br>TCGAATTCCTGCAGCCTGGAACCTCATCCCATACGC | This Paper          | RD103      |
| Reverse primer to amplify <i>mat-2</i> genomic region for RNAi:<br>TGACGCGTGGATCCCCATTGGAACCTCCAGATGCT  | This Paper          | RD104      |
| Additional oligonucleotides                                                                             | This Paper          | Table S3   |
| Recombinant DNA                                                                                         |                     |            |
| pDD111 – <i>P<sub>egl-1</sub>::mCherry::PH::unc-54 3'UTR</i>                                            | This Paper          | N/A        |
| pL4440 – <i>atl-1</i>                                                                                   | This Paper          | N/A        |

|                                 |                              |                                                                                                                             |
|---------------------------------|------------------------------|-----------------------------------------------------------------------------------------------------------------------------|
| pL4440 – <i>mat-2</i>           | This Paper                   | N/A                                                                                                                         |
| pL4440 – <i>lin-15B</i>         | This Paper                   | N/A                                                                                                                         |
| pAA173                          | Ziel <i>et al.</i> , 2009    | N/A                                                                                                                         |
| pPD122.56                       | Andrew Fire                  | L4054,<br>RRID:Addgene_1632                                                                                                 |
| p76-16B                         | Bloom and Horvitz,<br>1997   | N/A                                                                                                                         |
| pML902                          | McMahon <i>et al.</i> , 2001 | N/A                                                                                                                         |
| Software and Algorithms         |                              |                                                                                                                             |
| ImageJ                          | NIH                          | <a href="https://imagej.nih.gov/ij/">https://imagej.nih.gov/ij/</a>                                                         |
| GraphPad Prism 7                | GraphPad Software            | <a href="https://www.graphpad.com/scientific-software/prism/">https://www.graphpad.com/scientific-software/prism/</a>       |
| Zen Blue                        | Zeiss                        | <a href="https://www.zeiss.com/microscopy/us/downloads/zen.html">https://www.zeiss.com/microscopy/us/downloads/zen.html</a> |
| Adobe Photoshop and Illustrator | Adobe                        | <a href="https://www.adobe.com/creativecloud.html">https://www.adobe.com/creativecloud.html</a>                             |
| Geneious 10.2.6                 | Biomatters, Inc.             | <a href="https://www.geneious.com/">https://www.geneious.com/</a>                                                           |
| Stowers ImageJ Plugin           | Jay Unruh                    | <a href="https://research.stowers.org/imageplugins/index.html">https://research.stowers.org/imageplugins/index.html</a>     |
| Other                           |                              |                                                                                                                             |
|                                 |                              |                                                                                                                             |
|                                 |                              |                                                                                                                             |
|                                 |                              |                                                                                                                             |
|                                 |                              |                                                                                                                             |
|                                 |                              |                                                                                                                             |

Table S3. Additional Oligonucleotides.

| REAGENT OR RESOURCE                                                                                   | SOURCE     | IDENTIFIER |
|-------------------------------------------------------------------------------------------------------|------------|------------|
| Forward primer to amplify <i>lin-15B</i> genomic DNA for RNAi:<br>TCGAATTCCTGCAGCGCTGACACAATTGCGAACAT | This paper | RD101      |
| Reverse primer to amplify <i>lin-15B</i> genomic DNA for RNAi:<br>TGACGCGTGGATCCCCGTGTGCATAAAGACCAAGG | This paper | RD102      |

Table S4. *C. elegans* and *E. coli* strains.

| REAGENT OR RESOURCE                                                                            | SOURCE                                                               | IDENTIFIER                         |
|------------------------------------------------------------------------------------------------|----------------------------------------------------------------------|------------------------------------|
| <i>C. elegans</i> Strain: Bristol N2                                                           | <i>Caenorhabditis</i> Genetics Center                                | N2                                 |
| <i>C. elegans</i> Strain OD70: <i>unc-119(ed3)</i> III; <i>Itls44</i> V                        | <i>Caenorhabditis</i> Genetics Center, Kachur <i>et al.</i> , (2008) | OD70;<br>RRID:WB-STRAIN:OD70       |
| <i>C. elegans</i> Strain GZ264: <i>unc-119(ed3)</i> III; <i>isls17</i>                         | <i>Caenorhabditis</i> Genetics Center, Brauchle <i>et al.</i> (2003) | GZ264;<br>RRID:WB-STRAIN:GZ264     |
| <i>C. elegans</i> Strain SV1668: <i>heSi192</i> II; <i>unc-119(ed3)</i> III                    | van Rijnberk <i>et al.</i> (2017)                                    | N/A                                |
| <i>C. elegans</i> Strain RW10026: <i>stls10026</i>                                             | <i>Caenorhabditis</i> Genetics Center, Boeck <i>et al.</i> , (2011)  | RW10026;<br>RRID:WB-STRAIN:RW10026 |
| <i>C. elegans</i> Strain MT8034: <i>ced-3(n717)</i> IV; <i>unc-76(e911)</i> V                  | This paper                                                           | N/A                                |
| <i>C. elegans</i> Strain MT12054: <i>ced-3(n3692)</i> IV                                       | Denning <i>et al.</i> (2012)                                         | N/A                                |
| <i>C. elegans</i> Strain MT20083: <i>nls433</i> I                                              | Denning <i>et al.</i> (2012)                                         | N/A                                |
| <i>C. elegans</i> Strain MT20117: <i>nls433</i> I; <i>ced-3(n3692)</i> IV                      | Denning <i>et al.</i> (2012)                                         | N/A                                |
| <i>C. elegans</i> Strain MT22348: <i>ced-3(n717)</i> IV; <i>unc-76(e911)</i> V; <i>nEx2188</i> | This paper                                                           | N/A                                |
| <i>C. elegans</i> Strain MT22380: <i>ced-3(n717)</i> IV; <i>unc-76(e911)</i> V; <i>nls632</i>  | This paper                                                           | N/A                                |
| <i>C. elegans</i> Strain MT22450: <i>ced-3(n3692)</i> IV; <i>stls10026</i> ; <i>nls632</i>     | This paper                                                           | N/A                                |
| <i>C. elegans</i> Strain MT25568: <i>ced-3(n3692)</i> IV; <i>nls861</i>                        | This paper                                                           | N/A                                |
| <i>C. elegans</i> Strain MT25639: <i>ced-3(n3692)</i> IV; <i>stls10026</i> ; <i>nls861</i>     | This paper                                                           | N/A                                |
| <i>C. elegans</i> Strain MT25640: <i>heSi192</i> II; <i>ced-3(n3692)</i> IV; <i>nls861</i>     | This paper                                                           | N/A                                |
| <i>C. elegans</i> Strain MT25692: <i>ced-3(n3692)</i> IV; <i>Itls44</i> V; <i>stls10026</i>    | This paper                                                           | N/A                                |
| <i>C. elegans</i> Strain MT25807: <i>ced-3(n3692)</i> IV; <i>nls861</i> ; <i>isls17</i>        | This paper                                                           | N/A                                |

| REAGENT OR RESOURCE                                          | SOURCE                                         | IDENTIFIER                         |
|--------------------------------------------------------------|------------------------------------------------|------------------------------------|
| <i>Escherichia coli</i> : OP50                               | <i>Caenorhabditis</i> Genetics Center          | WB Cat#OP50, RRID:WB-STRAIN:OP50   |
| <i>Escherichia coli</i> : HT115                              | <i>Caenorhabditis</i> Genetics Center          | WB Cat#HT115, RRID:WB-STRAIN:HT115 |
| <i>Escherichia coli</i> : HT115-pL4440 (Control)             | Timmons and Fire, (1998)                       |                                    |
| <i>Escherichia coli</i> : HT115-W03G6.1 ( <i>pig-1</i> )     | Fraser <i>et al.</i> (2000), Source BioScience | Cat#3318_Cel_RNAi_complete         |
| <i>Escherichia coli</i> : HT115-C17G10.4 ( <i>cdc-14</i> )   | Fraser <i>et al.</i> (2000), Source BioScience | Cat#3318_Cel_RNAi_complete         |
| <i>Escherichia coli</i> : HT115-K06A5.7 ( <i>cdc-25.1</i> )  | Fraser <i>et al.</i> (2000), Source BioScience | Cat#3318_Cel_RNAi_complete         |
| <i>Escherichia coli</i> : HT115-F16B4.8 ( <i>cdc-25.2</i> )  | Fraser <i>et al.</i> (2000), Source BioScience | Cat#3318_Cel_RNAi_complete         |
| <i>Escherichia coli</i> : HT115-ZK637.11 ( <i>cdc-25.3</i> ) | Fraser <i>et al.</i> (2000), Source BioScience | Cat#3318_Cel_RNAi_complete         |
| <i>Escherichia coli</i> : HT115-R05H5.2 ( <i>cdc-25.4</i> )  | Fraser <i>et al.</i> (2000), Source BioScience | Cat#3318_Cel_RNAi_complete         |
| <i>Escherichia coli</i> : HT115-T05G5.3 ( <i>cdk-1</i> )     | Rual <i>et al.</i> , (2004), Open BioSystems   | Cat#RCE1182                        |
| <i>Escherichia coli</i> : HT115-B0495.2 ( <i>cdk-11.1</i> )  | Fraser <i>et al.</i> (2000), Source BioScience | Cat#3318_Cel_RNAi_complete         |
| <i>Escherichia coli</i> : HT115-ZC504.3 ( <i>cdk-11.2</i> )  | Fraser <i>et al.</i> (2000), Source BioScience | Cat#3318_Cel_RNAi_complete         |
| <i>Escherichia coli</i> : HT115-B0285.1 ( <i>cdk-12</i> )    | Rual <i>et al.</i> , (2004), Open BioSystems   | Cat#RCE1182                        |
| <i>Escherichia coli</i> : HT115-K03E5.3 ( <i>cdk-2</i> )     | Fraser <i>et al.</i> (2000), Source BioScience | Cat#3318_Cel_RNAi_complete         |
| <i>Escherichia coli</i> : HT115-F18H3.5 ( <i>cdk-4</i> )     | Fraser <i>et al.</i> (2000), Source BioScience | Cat#3318_Cel_RNAi_complete         |
| <i>Escherichia coli</i> : HT115-T27E9.3 ( <i>cdk-5</i> )     | Fraser <i>et al.</i> (2000), Source BioScience | Cat#3318_Cel_RNAi_complete         |
| <i>Escherichia coli</i> : HT115-Y39G10AL.3 ( <i>cdk-7</i> )  | Rual <i>et al.</i> , (2004), Open BioSystems   | Cat#RCE1182                        |
| <i>Escherichia coli</i> : HT115-F39H11.3 ( <i>cdk-8</i> )    | Fraser <i>et al.</i> (2000), Source BioScience | Cat#3318_Cel_RNAi_complete         |
| <i>Escherichia coli</i> : HT115-H25P06.2 ( <i>cdk-9</i> )    | Fraser <i>et al.</i> (2000), Source BioScience | Cat#3318_Cel_RNAi_complete         |
| <i>Escherichia coli</i> : HT115-Y54E10A.15 ( <i>cdt-1</i> )  | Rual <i>et al.</i> , (2004), Open BioSystems   | Cat#RCE1182                        |
| <i>Escherichia coli</i> : HT115-Y39H10A.7 ( <i>chk-1</i> )   | Rual <i>et al.</i> , (2004), Open BioSystems   | Cat#RCE1182                        |
| <i>Escherichia coli</i> : HT115-F44B9.4 ( <i>cit-1.1</i> )   | Source BioScience                              | Cat#3317_Cel_RNAi_supplement_whole |
| <i>Escherichia coli</i> : HT115-F44B9.3 ( <i>cit-1.2</i> )   | Fraser <i>et al.</i> (2000), Source BioScience | Cat#3318_Cel_RNAi_complete         |
| <i>Escherichia coli</i> : HT115-T05A6.1 ( <i>cki-1</i> )     | Fraser <i>et al.</i> (2000), Source BioScience | Cat#3318_Cel_RNAi_complete         |
| <i>Escherichia coli</i> : HT115-T05A6.2 ( <i>cki-2</i> )     | Fraser <i>et al.</i> (2000), Source BioScience | Cat#3318_Cel_RNAi_complete         |
| <i>Escherichia coli</i> : HT115-C07H6.6 ( <i>clk-2</i> )     | Source BioScience                              | Cat#3317_Cel_RNAi_supplement_whole |
| <i>Escherichia coli</i> : HT115-D2045.6 ( <i>cul-1</i> )     | Fraser <i>et al.</i> (2000), Source BioScience | Cat#3318_Cel_RNAi_complete         |
| <i>Escherichia coli</i> : HT115-ZK520.4 ( <i>cul-2</i> )     | Rual <i>et al.</i> , (2004), Open BioSystems   | Cat#RCE1182                        |

|                                                              |                                                |                                    |
|--------------------------------------------------------------|------------------------------------------------|------------------------------------|
| <i>Escherichia coli</i> : HT115-Y108G3AL.1 ( <i>cul-3</i> )  | Source BioScience                              | Cat#3317_Cel_RNAi_supplement_whole |
| <i>Escherichia coli</i> : HT115-F45E12.3 ( <i>cul-4</i> )    | Fraser <i>et al.</i> (2000), Source BioScience | Cat#3318_Cel_RNAi_complete         |
| <i>Escherichia coli</i> : HT115-ZK507.6 ( <i>cya-1</i> )     | Rual <i>et al.</i> , (2004), Open BioSystems   | Cat#RCE1182                        |
| <i>Escherichia coli</i> : HT115-ZC168.4 ( <i>cyb-1</i> )     | Source BioScience                              | Cat#3317_Cel_RNAi_supplement_whole |
| <i>Escherichia coli</i> : HT115-Y43E12A.1 ( <i>cyb-2.1</i> ) | Rual <i>et al.</i> , (2004), Open BioSystems   | Cat#RCE1182                        |
| <i>Escherichia coli</i> : HT115-H31G24.4 ( <i>cyb-2.2</i> )  | Rual <i>et al.</i> , (2004), Open BioSystems   | Cat#RCE1182                        |
| <i>Escherichia coli</i> : HT115-T06E6.2 ( <i>cyb-3</i> )     | Fraser <i>et al.</i> (2000), Source BioScience | Cat#3318_Cel_RNAi_complete         |
| <i>Escherichia coli</i> : HT115-H14E04.5 ( <i>cic-1</i> )    | Source BioScience                              | Cat#3317_Cel_RNAi_supplement_whole |
| <i>Escherichia coli</i> : HT115-Y38F1A.5 ( <i>cyd-1</i> )    | Fraser <i>et al.</i> (2000), Source BioScience | Cat#3318_Cel_RNAi_complete         |
| <i>Escherichia coli</i> : HT115-C37A2.4 ( <i>cye-1</i> )     | Rual <i>et al.</i> , (2004), Open BioSystems   | Cat#RCE1182                        |
| <i>Escherichia coli</i> : HT115-Y49F6B.1 ( <i>cyh-1</i> )    | Rual <i>et al.</i> , (2004), Open BioSystems   | Cat#RCE1182                        |
| <i>Escherichia coli</i> : HT115-C52E4.6 ( <i>cyl-1</i> )     | Fraser <i>et al.</i> (2000), Source BioScience | Cat#3318_Cel_RNAi_complete         |
| <i>Escherichia coli</i> : HT115-ZK353.1 ( <i>cyy-1</i> )     | Fraser <i>et al.</i> (2000), Source BioScience | Cat#3318_Cel_RNAi_complete         |
| <i>Escherichia coli</i> : HT115-T23G7.1 ( <i>dpl-1</i> )     | Source BioScience                              | Cat#3317_Cel_RNAi_supplement_whole |
| <i>Escherichia coli</i> : HT115-Y102A5C.18 ( <i>efl-1</i> )  | Fraser <i>et al.</i> (2000), Source BioScience | Cat#3318_Cel_RNAi_complete         |
| <i>Escherichia coli</i> : HT115-F10B5.6 ( <i>emb-27</i> )    | Fraser <i>et al.</i> (2000), Source BioScience | Cat#3318_Cel_RNAi_complete         |
| <i>Escherichia coli</i> : HT115-F54C8.3 ( <i>emb-30</i> )    | Fraser <i>et al.</i> (2000), Source BioScience | Cat#3318_Cel_RNAi_complete         |
| <i>Escherichia coli</i> : HT115-ZK1307.6 ( <i>fzr-1</i> )    | Source BioScience                              | Cat#3317_Cel_RNAi_supplement_whole |
| <i>Escherichia coli</i> : HT115-ZK177.6 ( <i>fzy-1</i> )     | Fraser <i>et al.</i> (2000), Source BioScience | Cat#3318_Cel_RNAi_complete         |
| <i>Escherichia coli</i> : HT115-F32A11.2 ( <i>hpr-17</i> )   | Fraser <i>et al.</i> (2000), Source BioScience | Cat#3318_Cel_RNAi_complete         |
| <i>Escherichia coli</i> : HT115-H26D21.1 ( <i>hus-1</i> )    | Fraser <i>et al.</i> (2000), Source BioScience | Cat#3318_Cel_RNAi_complete         |
| <i>Escherichia coli</i> : HT115-K10B2.1 ( <i>lin-23</i> )    | Fraser <i>et al.</i> (2000), Source BioScience | Cat#3318_Cel_RNAi_complete         |
| <i>Escherichia coli</i> : HT115-C32F10.2 ( <i>lin-35</i> )   | Fraser <i>et al.</i> (2000), Source BioScience | Cat#3318_Cel_RNAi_complete         |
| <i>Escherichia coli</i> : HT115-F44B9.6 ( <i>lin-36</i> )    | Fraser <i>et al.</i> (2000), Source BioScience | Cat#3318_Cel_RNAi_complete         |
| <i>Escherichia coli</i> : HT115-ZK637.7 ( <i>lin-9</i> )     | Fraser <i>et al.</i> (2000), Source BioScience | Cat#3318_Cel_RNAi_complete         |
| <i>Escherichia coli</i> : HT115-Y110A7A.17 ( <i>mat-1</i> )  | Rual <i>et al.</i> , (2004), Open BioSystems   | Cat#RCE1182                        |
| <i>Escherichia coli</i> : HT115-F10C5.1 ( <i>mat-3</i> )     | Rual <i>et al.</i> , (2004), Open BioSystems   | Cat#RCE1182                        |
| <i>Escherichia coli</i> : HT115-C50F4.11 ( <i>mdf-1</i> )    | Rual <i>et al.</i> , (2004), Open BioSystems   | Cat#RCE1182                        |
| <i>Escherichia coli</i> : HT115-Y69A2AR.30 ( <i>mdf-2</i> )  | Rual <i>et al.</i> , (2004), Open BioSystems   | Cat#RCE1182                        |



|                                                              |                                                |                                    |
|--------------------------------------------------------------|------------------------------------------------|------------------------------------|
| <i>Escherichia coli</i> : HT115-Y41C4A.14 ( <i>mrt-2</i> )   | Rual <i>et al.</i> , (2004), Open BioSystems   | Cat#RCE1182                        |
| <i>Escherichia coli</i> : HT115-T23G5.1 ( <i>rnr-1</i> )     | Rual <i>et al.</i> , (2004), Open BioSystems   | Cat#RCE1182                        |
| <i>Escherichia coli</i> : HT115-ZC328.4 ( <i>san-1</i> )     | Rual <i>et al.</i> , (2004), Open BioSystems   | Cat#RCE1182                        |
| <i>Escherichia coli</i> : HT115-F35H8.7 ( <i>wee-1.1</i> )   | Rual <i>et al.</i> , (2004), Open BioSystems   | Cat#RCE1182                        |
| <i>Escherichia coli</i> : HT115-Y53C12A.1 ( <i>wee-1.3</i> ) | Rual <i>et al.</i> , (2004), Open BioSystems   | Cat#RCE1182                        |
| <i>Escherichia coli</i> : HT115-R53.6 ( <i>psf-1</i> )       | Rual <i>et al.</i> , (2004), Open BioSystems   | Cat#RCE1182                        |
| <i>Escherichia coli</i> : HT115-F31C3.5 ( <i>psf-2</i> )     | Rual <i>et al.</i> , (2004), Open BioSystems   | Cat#RCE1182                        |
| <i>Escherichia coli</i> : HT115-Y65B4BR.8 ( <i>psf-3</i> )   | Rual <i>et al.</i> , (2004), Open BioSystems   | Cat#RCE1182                        |
| <i>Escherichia coli</i> : HT115-Y59A8A.1 ( <i>csn-1</i> )    | Rual <i>et al.</i> , (2004), Open BioSystems   | Cat#RCE1182                        |
| <i>Escherichia coli</i> : HT115-Y55F3AM.15 ( <i>csn-4</i> )  | Rual <i>et al.</i> , (2004), Open BioSystems   | Cat#RCE1182                        |
| <i>Escherichia coli</i> : HT115-B0547.1 ( <i>csn-5</i> )     | Rual <i>et al.</i> , (2004), Open BioSystems   | Cat#RCE1182                        |
| <i>Escherichia coli</i> : HT115-Y39A1A.23 ( <i>hpr-9</i> )   | Source BioScience                              | Cat#3317_Cel_RNAi_supplement_whole |
| <i>Escherichia coli</i> : HT115-Y75B8A.22 ( <i>tim-1</i> )   | Source BioScience                              | Cat#3317_Cel_RNAi_supplement_whole |
| <i>Escherichia coli</i> : HT115-F23C8.9 ( <i>tipn-1</i> )    | Fraser <i>et al.</i> (2000), Source BioScience | Cat#3318_Cel_RNAi_complete         |
| <i>Escherichia coli</i> : HT115-F37D6.1 ( <i>mus-101</i> )   | Fraser <i>et al.</i> (2000), Source BioScience | Cat#3318_Cel_RNAi_complete         |
| <i>Escherichia coli</i> : HT115-F25H5.5 ( <i>clsp-1</i> )    | Fraser <i>et al.</i> (2000), Source BioScience | Cat#3318_Cel_RNAi_complete         |
| <i>Escherichia coli</i> : HT115-F18A1.5 ( <i>rpa-1</i> )     | Fraser <i>et al.</i> (2000), Source BioScience | Cat#3318_Cel_RNAi_complete         |
| <i>Escherichia coli</i> : HT115-T06E4.3 ( <i>atl-1</i> )     | This paper                                     | N/A                                |
| <i>Escherichia coli</i> : HT115-W10C6.1 ( <i>mat-2</i> )     | This paper                                     | N/A                                |
| <i>Escherichia coli</i> : HT115-ZK662.4 ( <i>lin-15B</i> )   | This paper                                     | N/A                                |
| <i>C. elegans</i> ORFeome RNAi Library v1.1                  | Rual <i>et al.</i> , (2004), Open BioSystems   | Cat#RCE1182                        |

## 774 **Materials and Methods**

### 775 **Plasmids**

776 L4054 was a gift from Andrew Fire (Addgene plasmid # 1632;  
777 <http://n2t.net/addgene:1632> ; RRID:Addgene\_1632). pDD111 -  $P_{egl-1}::mCherry::PH::unc-54$  3'UTR was generated with the following steps: i) 6.8 Kb  
778 of the *egl-1* promoter was amplified from genomic DNA with Phusion DNA  
779 polymerase using the primers DPD660 and DPD661; ii) the amplicon was  
780 digested with PstI and SacI (New England Biolabs) and ligated into pPD122.56,  
781 which encodes 4xNLS::GFP to generate  $P_{egl-1}::4xNLS::GFP::unc-54$  3'UTR; iii)  
782 mCherry-PH (Pleckstrin Homology) sequence was amplified from pAA173 using  
783 DPD647 and DPD648 and digested with EcoRI and AgeI (New England Biolabs)  
784 and ligated into the pDD122.56 -  $P_{egl-1}::4xNLS::GFP::unc-54$  3'UTR, which  
785 generated the plasmid pDD122.56 -  $P_{egl-1}::4xNLS::mCherry::PH::unc-54$  3'UTR;  
786 iv) the 4xNLS sequence was removed with the primers DPD695 and DPD696  
787 using QuikChange Site-Directed Mutagenesis (Agilent) to generate pDD111 -  
788  $P_{egl-1}::mCherry::PH::unc-54$  3'UTR.

790 RNAi clones were constructed for *atl-1*, *mat-2* and *lin-15B*. Genomic regions of  
791 about 1 kb were amplified from wild-type genomic lysates using Q5 Hot Start  
792 high-fidelity polymerase (New England Biolabs) with the following primers:

793 *atl-1*

794 RD105 TCGAATTCCTGCAGCTCCTCGAACCCATCATCCCT

795 RD106 TGACGCGTGGATCCCATGAAGCTGCGTGGTTGTTG

796 *mat-2*

797 RD103 TCGAATTCCTGCAGCCTGGAACCTCATCCCATACGC

798 RD104 TGACGCGTGGATCCCCATTGGAACCTCCAGATGCT

799 *lin-15B*

800 RD101 TCGAATTCCTGCAGCGCTGACACAATTGCGAACAT

801 RD102 TGACGCGTGGATCCCCGTGTGCATAAAGACCAAGG

802 These inserts were cloned into the pL4440 vector linearized with *Xma*I (New  
803 England Biolabs) using the In-Fusion HD cloning kit (TaKaRa) according to  
804 manufacturers instructions. The cloned vector was then transformed into  
805 competent HT115 bacterial cells. Correct RNAi clones were identified by Sanger  
806 sequencing. Geneious 10.2.6 (Biomatters, Inc.) was used to guide all plasmid  
807 design and construction.

#### 808 **Contact for Reagent and Resource Sharing**

809 Further information and resource sharing requests should be directed to and will  
810 be fulfilled by the lead contact, H. Robert Horvitz ([horvitz@mit.edu](mailto:horvitz@mit.edu)).

#### 811 **Strains, transgenes and mutations**

812

813 *C. elegans* hermaphrodite strains were maintained on Nematode Growth Medium  
814 (NGM) plates containing 3 g/L NaCl, 2.5 g/L peptone and 17 g/L agar  
815 supplemented with 1 mM CaCl<sub>2</sub>, 1 mM MgSO<sub>4</sub>, 1 mM KPO<sub>4</sub> and 5 mg/L  
816 Cholesterol with *E. coli* OP50 as a source of food (Brenner, 1974). All strains  
817 were derived from Bristol N2 and are listed in Table S2. *ced-3(lf)* refers to the  
818 *n3692* deletion allele of *ced-3* (Denning *et al.*, 2012). *C. elegans* strains carrying  
819 the transgenes *nls861* and *isls17* were maintained at 25°C. All other strains were  
820 maintained at 22°C. The transgenes and mutations used are listed below:

821 **LGI:** *nls433*[*P<sub>pgp-12</sub>::4xNLS::GFP::unc-54 3'UTR; p76-16B(unc-76(+))*]  
822 **LGII:** *heSi192*[*P<sub>eft-3</sub>::tDHB::eGFP::tbb-2 3'UTR + Cbr-unc119(+)*]  
823 **LGIII:** *unc-119(ed3)*  
824 **LGIV:** *ced-3(n3692, n717)*  
825 **LGV:** *unc-76(e911), ltIs44*[*P<sub>pie-1</sub>::mCherry::PH(PLC1delta1) + unc-119(+)*]  
826 **Unknown linkage:** *stIs10026*[*P<sub>his-72</sub>::HIS-72::GFP*], *isIs17*[*pGZ295*(*P<sub>pie-</sub>*  
827 *<sub>1</sub>::GFP::pcn-1(W03D2.4)*), *pDP#MM051* (*unc-119(+)*), *nIs861*[*pDD111*(*P<sub>egl-</sub>*  
828 *<sub>1</sub>::mCherry::PH::unc-54 3'UTR*)], *nIs632*[*pDD111*(*P<sub>egl-1</sub>::mCherry::PH::unc-54*  
829 *3'UTR*), *pML902* (*dlg-1::GFP*), *p76-16B(unc-76(+))*]  
830 **Extrachromosomal array:** *nEx2188*[*pDD111*(*P<sub>egl-1</sub>::mCherry::PH::unc-54*  
831 *3'UTR*), *pML902* (*dlg-1::GFP*), *unc-76(+)*]

832 *nIs632* and *nIs861* express membrane-localized mCherry from the *egl-1*  
833 promoter, which facilitated the identification of ABp1pappap (an *egl-1* expressing  
834 cell). *nIs632* does not express *dlg-1::GFP*, presumably as a result of partial  
835 transgene silencing (Hsieh *et al.* 1999; Grishok *et al.* 2005; Fischer *et al.* 2013).  
836 *stIs10026* (Boeck *et al.*, 2011) ubiquitously expresses a GFP-tagged histone  
837 HIS-72 from its endogenous promoter, which produces fluorescence in the nuclei  
838 of all cells and facilitates in providing the context in which extrusion events are  
839 observed.

#### 840 **Germline transformation**

841 Transgenic lines were generated using the standard germline transformation  
842 procedure (Mello *et al.*, 1991). Extrachromosomal array transgene *nEx2188* was  
843 generated by injecting pML902 at 3 ng/μL, pDD111 at 40 ng/μL, p76-16B (unc-

844 76(+)) at 60 ng/ul and 1Kb Plus DNA ladder (Thermo Fischer Scientific) at 50 ng/  
845  $\mu$ l into *ced-3(n717) IV; unc-76(e911) V* double mutant animals. *nIs632* was  
846 generated by gamma-ray irradiation (4,800 rads) of *nEx2188*-carrying L4 animals  
847 and was identified by the 100% transmission of the transgene from transformed  
848 parent to progeny. *nIs861* was a spontaneous integration in a germline cell of an  
849 animal injected with pDD111 at 10 ng/ $\mu$ L and 1 kb DNA ladder at 90 ng/ $\mu$ L, and  
850 was identified by the 100% transmission of the transgene from transformed  
851 parent to progeny.

### 852 **RNAi treatments and genome-wide RNAi screen**

853 Previously described feeding RNAi constructs and reagents were used to  
854 perform RNAi feeding experiments (Fraser *et al.*, 2000; Rual *et al.*, 2004). Briefly,  
855 HT115 *Escherichia coli* bacteria carrying RNAi clones in the pL4440 vector were  
856 grown for at least 12 h in Luria broth (LB) liquid media with 75 mg/L ampicillin at  
857 37°C. These cultures were seeded onto 6 cm Petri plates with Nematode Growth  
858 Medium (NGM) containing 1 mM isopropyl- $\beta$ -D-thiogalactopyranoside (IPTG)  
859 (Amresco) and 75 mg/L ampicillin and incubated for 24 h at 22°C. For imaging  
860 experiments using confocal microscopy, 10 L4 animals were added to each RNAi  
861 plate and imaging of progeny embryos was performed on the next day as  
862 described in Microscopy below. For excretory cell counts, five L4 animals were  
863 added to each RNAi plate and L3-L4 progeny were scored for number of  
864 excretory cells, as described in Excretory cell count below. In case a bacterial  
865 clone targeting a certain gene was not available in previously constructed

866 libraries (Kamath *et al.*, 2003; Rual *et al.*, 2004), we generated our own RNAi  
867 clone as described in Molecular biology above.

868 The ORFeome RNAi library was used to conduct a genome-wide RNAi  
869 screen (Rual *et al.*, 2004). For each day of the RNAi screen, all bacterial colonies  
870 from two 96-well plates were cultured for at least 12 h at 37°C in LB with 75 mg/L  
871 ampicillin. These cultures were then pre-incubated with 1 mM IPTG (Amresco)  
872 for 1 h to maximize induction of dsRNA production. 24-well plates with each well  
873 containing 2 mL NGM medium with 1 mM IPTG (Amresco) and 75 mg/L  
874 ampicillin were prepared in advance and stored at 4°C until needed; they were  
875 brought to room temperature a few hours before seeding. Each bacterial colony  
876 culture was then seeded onto an individual well of a 24-well plate and incubated  
877 for 24 h at 20°C. Three L4 animals were picked into a 10 µl drop of M9 medium,  
878 which facilitated their transfer into a well using a pipette. The progeny of these 3  
879 animals were screened 3 days later. Each set of RNAi clones screened also  
880 included a *pig-1* RNAi positive control and an empty pL4440 vector negative  
881 control. The scorer was blinded to the identity of the RNAi clones. Excretory cell  
882 counts were performed as described in Excretory cell counts below. Sanger  
883 sequencing was used to confirm the identity of RNAi clones that reproducibly  
884 generated a Tex phenotype for more than 10% of the animals scored.

### 885 **Microscopy**

886 All RNAi screens scoring excretory cells were performed using a Nikon SMZ18  
887 fluorescent dissecting microscope. DIC and epifluorescence images were

888 obtained using a 63x objective lens (Zeiss) on an Axiolmager Z2 (Zeiss)  
889 compound microscope and Zen Blue software (Zeiss).

890 For confocal microscopy, embryos staged at the 200-300-cell stage were  
891 picked and mounted onto a glass slide (Corning) with a freshly prepared 2%  
892 agarose pad. Embryos with ventral surfaces facing the objective were selected  
893 for imaging. Confocal images were obtained using a 63x objective lens (Zeiss) on  
894 a Zeiss LSM800 confocal microscope.

895 For observing extrusion (or absence of extrusion), we focused particularly  
896 on the cell ABplpappap, the identification of which is facilitated by its central  
897 position on the ventral surface (Sulston *et al.*, 1983). The fluorescent transgene  
898 *nls861[Pegl-1::mCherry::PH]* or *nls632[Pegl-1::mCherry::PH; dlg-1::GFP]*, which  
899 express the Pleckstrin homology domain of PLC- $\delta$  fused to mCherry from the  
900 promoter of *egl-1*, was used to label the membrane of the ABplpappap cell, an  
901 *egl-1* expressing cell (Denning *et al.*, 2012), to further facilitate cell identification.  
902 Another fluorescent transgene *stls10026[his-72::GFP]*, which expresses GFP-  
903 tagged HIS-72 histone protein, was used to label the nuclei of all cells to help  
904 define ABplpappap's location within the embryo. Time-lapse confocal microscopy  
905 was used to monitor the location of ABplpappap in embryos, keeping the cell in  
906 view by refocusing on it every 30 sec. Confocal imaging during a period of about  
907 50 min during which ventral enclosure (migration and meeting of hypodermal  
908 cells on the ventral surface of the embryo) occurs was sufficient to determine  
909 whether ABplpappap did or did not undergo extrusion.

910 For determining whether ABplpappap and other cells that are extruded  
911 entered the cell cycle, the transgene *heSi192[Peft-3::tDHB::eGFP::tbb-2 3'UTR]*  
912 was used to express a codon-optimized (for *C. elegans*) C-terminal fragment of  
913 Human DNA Helicase B, which translocates from the nucleus to the cytoplasm in  
914 response to the activity of the cell cycle CDKs 1 and 2 (van Rijnberk *et al.*, 2017).  
915 *nIs861* was used to label the membrane of ABplpappap with mCherry to facilitate  
916 cell identification.

917 For determining the cell cycle phase of ABplpappap and other extruded  
918 cells, *isIs17[Ppie-1::GFP::PCN-1]* was used to express GFP-tagged PCN-1  
919 protein, which produces a phase-specific fluorescence intensity and localization  
920 pattern. *nIs861* was used to label the membrane of ABplpappap with mCherry to  
921 facilitate cell identification.

922 Images were processed with ImageJ software (NIH), Photoshop CC 2019  
923 (Adobe) and Illustrator CC 2019 (Adobe) software. The Time Stamper function in  
924 the Stowers ImageJ plugin was used to mark elapsed time on time-lapse videos.

## 925 **Excretory cell counts**

926 Excretory cell counts were performed using a dissecting microscope equipped  
927 with fluorescence at a total magnification of 270x. For the genome-wide RNAi  
928 screen, roughly 50 animals were examined in each well of a 24-well plate and  
929 any well with more than 5 animals with two excretory cells was marked for  
930 confirmatory testing. Excretory cell counts in confirmatory RNAi experiments,  
931 candidate RNAi experiments and experiments with genetic mutants were  
932 conducted using 6 cm Petri plates with appropriate media. Animals were first



933 immobilized by keeping the Petri plates on ice for 30 min. At least 100 animals at  
934 the L3-L4 larval stage were scored for each genotype or RNAi experiment unless  
935 there was extensive lethality or a growth defect, in which case a lower number or  
936 earlier-stage animals, respectively, were scored. A cell was scored as an  
937 excretory cell if it was located in the anterior half of the animal and its nucleus  
938 had strong GFP expression.

### 939 **tDHB-GFP fluorescence intensity quantification**

940 The ABplpappap nuclear boundary, cell membrane boundary and the tDHB-GFP  
941 fluorescence signal were determined from DIC, mCherry and GFP channels,  
942 respectively, of confocal images of RNAi treated *ced-3(lf)* embryos expressing  
943 the transgenes *heSi192* and *nls861*. Mean tDHB-GFP fluorescence intensities  
944 inside the nuclear region, entire cell and background were quantified using Fiji  
945 software. Mean cytoplasmic tDHB-GFP fluorescence intensity was calculated by  
946 the following formula

$$I_{cytoplasm} = \frac{(I_{cell} * cell\ area) - (I_{nucleus} * nucleus\ area)}{cell\ area - nucleus\ area}$$

947  $I_{cytoplasm}$ ,  $I_{cell}$  and  $I_{nucleus}$  denote the mean tDHB fluorescence intensity in the  
948 cytoplasm, cell and nucleus, respectively. The ratio of nuclear-to-cytoplasmic  
949 tDHB fluorescence intensity in Figure 3H was adjusted for background  
950 fluorescence (measured from a random area outside the embryo boundaries),  
951 i.e., the background fluorescence intensity was subtracted from both nuclear and  
952 cytoplasmic fluorescence intensity values before calculating the ratios.

### 953 **Calculation of cell size**

954 Confocal micrographs were obtained for multiple focal planes starting at the  
955 ventral surface and ending at the dorsal surface of the embryo, with each plane  
956 separated by a distance of 0.37  $\mu\text{m}$ . The greatest area occupied by a cell in any  
957 plane was designated the “maximum area” of a cell.

#### 958 **Cell culture**

959 MDCK and MDCK-Fucci (Streichan et al., 2014) cells were cultured in DMEM  
960 supplemented with 10% fetal bovine serum and 1% penicillin/streptomycin in a  
961 humidified incubator at 37°C with 5% CO<sub>2</sub>.

#### 962 **Chemicals**

963 2 mM HU (Millipore Sigma, Cat#H8627) was prepared in culture medium prior to  
964 each experiment.

#### 965 **Mammalian cell imaging**

966 These assays were performed using 6-well plastic plates. 20,000 MDCK cells  
967 were seeded in each well and grown to confluence for 72 h. The day of the  
968 experiment, cells were washed twice with PBS and treated with fresh medium or  
969 2 mM HU in medium. After equilibration, plates were imaged at 15-min intervals  
970 for up to 24 h, using an Evos M7000 imaging system equipped with a humidified  
971 onstage incubator (37°C, 5% CO<sub>2</sub>). Several positions per well were imaged in the  
972 phase contrast and green and red fluorescence channels available in this  
973 system.

#### 974 **Mammalian cell extrusion quantification**

975 In time-lapse phase contrast images, extruding cells are easily identifiable as  
976 bright, white, rounded spots emerging from the epithelial plane. We counted the

977 number of cells with these features for each condition using the Cell Counter  
978 plugin of Fiji (Schindelin *et al.*, 2012). Extrusions are reported as *number of*  
979 *extruding cells/h* for comparison between experiments of different duration.

#### 980 **Mammalian cell cycle phase determination**

981 The Fucci system differentially labels the nuclei of cells in G1 (red) and S/G2/M  
982 (green) (Sakaue-Sawano *et al.*, 2008). Images of MDCK-Fucci cells with HU or  
983 control treatment were obtained in the phase contrast, red and green  
984 fluorescence channels as per Mammalian cell imaging above. For each position,  
985 a multi-channel stack was built using Fiji (Schindelin *et al.*, 2012). After  
986 identifying an extruded cell in the phase contrast channel, the cell cycle phase  
987 was determined using the fluorescence channels.

#### 988 **Mammalian re-seeding experiments**

989 At the end of an imaging experiment, supernatants were collected and  
990 centrifuged (1200 rpm, 5 min, room temperature). Pellets were re-suspended in  
991 50  $\mu$ L of PBS, and 10  $\mu$ L of the suspension was used for cell counting with  
992 Trypan blue in a Neubauer chamber, allowing us to simultaneously calculate the  
993 number of cells being re-seeded and the fraction of cells that was apoptotic.

994 The remaining cells were seeded with 1 mL of fresh medium in a 24-well plate  
995 and grown in the cell culture incubator. Pictures were taken at 2 h and 24 h for  
996 cell counting.

#### 997 **Statistical analysis**

998 For calculation of statistical significance for ratios, the ratios were first  
999 transformed to logarithm values. Ordinary one-way ANOVA was performed to

1000 determine statistical significance of the ratios with the assumption that logarithm  
1001 of ratios produced a normal distribution of values. The maximum area of  
1002 ABp/pappap was also assumed to have normal distribution under different RNAi  
1003 conditions and ordinary one-way ANOVA was used to determine statistical  
1004 significance. Normal distributions with unequal variances were assumed for rates  
1005 of extrusion under HU and vehicle treatments, and Welch's two-tailed t-test was  
1006 performed to determine statistical significance. No assumptions were made  
1007 about the distributions of the rates of apoptosis under HU and vehicle treatments,  
1008 and hence the Mann-Whitney test was used to determine statistical significance.  
1009 No assumptions were made about the distribution of fraction of extruded cells in  
1010 different phases of the cell cycle after HU and vehicle treatments, and the  
1011 Kruskal-Wallis test was used to determine statistical significance. Normal  
1012 distribution was assumed for numbers of cells reseeded in fresh media after pre-  
1013 treatment in different conditions, and ordinary one-way ANOVA was used to  
1014 determine statistical significance. All statistical analysis was performed using  
1015 Prism 7 (GraphPad Software).

1016 **References**

1017

1018 Andrade, D., and Rosenblatt, J. (2011). Apoptotic regulation of epithelial cellular  
1019 extrusion. *Apoptosis*. *16*, 491-501.

1020

1021 Anton, K.A., Kajita, M., Narumi, R., Fujita, Y., and Tada, M. (2018). Src-  
1022 transformed cells hijack mitosis to extrude from the epithelium. *Nat.*  
1023 *Commun.* *9*, 4695.

1024

1025 Bianchi, V., Zantedeschi, A., and Levis, A.G. (1983). The scintillometric  
1026 evaluation of DNA repair synthesis can be distorted by changes of  
1027 thymidine pool radioactivity. *Chem. Biol. Interact.* *43*,17-31.

1028

1029 Bloom, L., and Horvitz, H.R. (1997). The *Caenorhabditis elegans* gene *unc-76*  
1030 and its human homologs define a new gene family involved in axonal  
1031 outgrowth and fasciculation. *Proc. Natl. Acad. Sci. U. S. A.* *94*, 3414-3419.

1032

1033 Boeck, M.E., Boyle, T., Bao, Z., Murray, J., Mericle, B., and Waterston, R.  
1034 (2011). Specific roles for the GATA transcription factors *end-1* and *end-3*  
1035 during *C. elegans* E-lineage development. *Dev. Biol.* *358*, 345-355.

1036

1037 Bowman, E.A., Bowman, C.R., Ahn, J.H., and Kelly, W.G. (2013).  
1038 Phosphorylation of RNA polymerase II is independent of P-TEFb in the *C.*  
1039 *elegans* germline. *Development.* *140*, 3703-3713.

1040

1041 Brauchle, M., Baumer, K., and Gönczy, P. (2003). Differential activation of the  
1042 DNA replication checkpoint contributes to asynchrony of cell division in *C.*  
1043 *elegans* embryos. *Curr Biol.* *13*, 819-827.

1044

1045 Brenner, S. (1974). The genetics of *Caenorhabditis elegans*. *Genetics.* *77*, 71-94.

1046

1047 Carroll, T.D., Newton, I.P., Chen, Y., Blow, J.J., and Näthke, I. (2018). Lgr5+  
1048 intestinal stem cells reside in an unlicensed G1 phase. *J. Cell Biol.* *217*,  
1049 1667-1685

1050

1051 Chisholm, A.D., and Hardin, J. (2005). Epidermal morphogenesis. *WormBook.* *1*,  
1052 1-22.

1053

1054 Cordes, S., Frank, C.A., and Garriga, G. (2006). The *C. elegans* MELK ortholog  
1055 PIG-1 regulates cell size asymmetry and daughter cell fate in asymmetric  
1056 neuroblast divisions. *Development* *133*, 2747-2756.

1057

1058 De Goeij, J.M., De Kluijver, A., Van Duyl, F.C., Vacelet, J., Wijffels, R.H., De  
1059 Goeij, A.F.R.M., Cleutjens, J.P.M., and Schutte, B. (2009). Cell kinetics of  
1060 the marine sponge *Halisarca caerulea* reveal rapid cell turnover and  
1061 shedding. *J. Exp. Biol.* *212*, 3892-3900.

- 1062  
1063 Denning, D.P., Hatch, V., and Horvitz, H.R. (2012). Programmed elimination of  
1064 cells by caspase-independent cell extrusion in *C. elegans*. *Nature* *488*,  
1065 226-230.  
1066  
1067 Eisenhoffer, G.T., Loftus, P.D., Yoshigi, M., Otsuna, H., Chien, C.B., Morcos,  
1068 P.A., and Rosenblatt, J. (2012). Crowding induces live cell extrusion to  
1069 maintain homeostatic cell numbers in epithelia. *Nature* *484*, 546-549.  
1070  
1071 Fay, D.S., and Han, M. (2000). Mutations in *cye-1*, a *Caenorhabditis elegans*  
1072 Cyclin E homolog, reveal coordination between cell-cycle control and  
1073 vulval development. *Development*. *127*, 4049-4060.  
1074  
1075 Fischer, S.E.J., Pan, Q., Breen, P.C., Qi, Y., Shi, Z., Zhang, C., and Ruvkun, G.  
1076 (2013). Multiple small RNA pathways regulate the silencing of repeated  
1077 and foreign genes in *C. elegans*. *Genes Dev.* *27*, 2678-2695.  
1078  
1079 Fraser, A.G., Kamath, R.S., Zipperlen, P., Martinez-Campos, M., Sohrmann, M.,  
1080 and Ahringer, J. (2000). Functional genomic analysis of *C. elegans*  
1081 chromosome I by systematic RNA interference. *Nature*. *408*, 325-330.  
1082  
1083 Fuchs, Y., and Steller, H. (2011). Programmed cell death in animal development  
1084 and disease. *Cell*. *147*, 742-758.  
1085  
1086 Gaillard, H., García-Muse, T., and Aguilera, A. (2015). Replication stress and  
1087 cancer. *Nat. Rev. Cancer* *15*, 276-289.  
1088  
1089 Grieve, A.G., and Rabouille, C. (2014). Extracellular cleavage of E-cadherin  
1090 promotes epithelial cell extrusion. *J. Cell Sci.* *127*, 3331-3346.  
1091  
1092 Grishok, A., Sinskey, J.L., and Sharp, P.A. (2005). Transcriptional silencing of a  
1093 transgene by RNAi in the soma of *C. elegans*. *Genes Dev.* *19*, 683-696.  
1094  
1095 Gu, Y., and Rosenblatt, J. (2012). New emerging roles for epithelial cell  
1096 extrusion. *Curr. Opin. Cell Biol.* *24*, 865-870.  
1097  
1098 Gu, Y., Shea, J., Slattum, G., Firpo, M.A., Alexander, M., Golubovskaya, V.M.,  
1099 and Rosenblatt, J. (2015). Defective apical extrusion signaling contributes  
1100 to aggressive tumor hallmarks. *Elife*. *4*, e04069.  
1101  
1102 Gudipaty, S.A., and Rosenblatt, J. (2017). Epithelial cell extrusion: Pathways and  
1103 pathologies. *Semin. Cell Dev. Biol.* *67*, 132-140.  
1104  
1105 Gudipaty, S.A., Lindblom, J., Loftus, P.D., Redd, M.J., Edes, K., Davey, C.F.,  
1106 Krishnegowda, V., and Rosenblatt, J. (2017). Mechanical stretch triggers  
1107 rapid epithelial cell division through Piezo1. *Nature*. *543*, 118-121.

- 1108  
1109 Günther, J., and Seyfert, H.M. (2018). The first line of defence: insights into  
1110 mechanisms and relevance of phagocytosis in epithelial cells. *Semin.*  
1111 *Immunopathol.* *40*, 555–565.  
1112  
1113  
1114 Hogan, C., Dupré-Crochet, S., Norman, M., Kajita, M., Zimmermann, C., Pelling,  
1115 A.E., Piddini, E., Baena-López, L.A., Vincent, J.P., Itoh, Y., Hosoya, H.,  
1116 Pichaud, F., and Fujita, Y. (2009). Characterization of the interface  
1117 between normal and transformed epithelial cells. *Nat. Cell Biol.* *11*,460-  
1118 467.  
1119  
1120 Hsieh, J., Liu, J., Kostas, S.A., Chang, C., Sternberg, P.W., and Fire, A. (1999).  
1121 The RING finger/B-box factor TAM-1 and a retinoblastoma-like protein  
1122 LIN-35 modulate context-dependent gene silencing in *Caenorhabditis*  
1123 *elegans*. *Genes Dev.* *13*, 2958–2970.  
1124  
1125 Jin, J., Shirogane, T., Xu, L., Nalepa, G., Qin, J., Elledge, S.J., and Harper, J.W.  
1126 (2003). SCF  $\beta$ -TRCP links Chk1 signaling to degradation of the Cdc25A  
1127 protein phosphatase. *Genes Dev.* *17*, 3062-3074.  
1128  
1129 Jones, M.C., Askari, J.A., Humphries, J.D., and Humphries, M.J. (2018). Cell  
1130 adhesion is regulated by CDK1 during the cell cycle. *J. Cell Biol.* *217*,  
1131 3203-3218.  
1132  
1133 Kachur, T.M., Audhya, A., and Pilgrim, D.B. (2008). UNC-45 is required for NMY-  
1134 2 contractile function in early embryonic polarity establishment and  
1135 germline cellularization in *C. elegans*. *Dev. Biol.* *314*, 287-299.  
1136  
1137 Kajita, M., Hogan, C., Harris, A.R., Dupre-Crochet, S., Itasaki, N., Kawakami, K.,  
1138 Charras, G., Tada, M., and Fujita, Y. (2010). Interaction with surrounding  
1139 normal epithelial cells influences signalling pathways and behaviour of  
1140 Src-transformed cells. *J. Cell Sci.* *123*, 171-180.  
1141  
1142 Kajita, M., and Fujita, Y. (2015). EDAC: Epithelial defence against cancer - Cell  
1143 competition between normal and transformed epithelial cells in mammals.  
1144 *J. Biochem.* *158*, 15-23.  
1145  
1146 Kamath, R.S., Fraser, A.G., Dong, Y., Poulin, G., Durbin, R., Gotta, M., Kanapin,  
1147 A., Le Bot, N., Moreno, S., Sohrmann, M., Welchman, D.P., Zipperlen, P.,  
1148 and Ahringer, J. (2003). Systematic functional analysis of the  
1149 *Caenorhabditis elegans* genome using RNAi. *Nature.* *421*, 231-237.  
1150  
1151 Kipreos, E.T., Gohel, S.P., and Hedgecock, E.M. (2000). The *C. elegans* F-  
1152 box/WD-repeat protein LIN-23 functions to limit cell division during  
1153 development. *Development.* *127*, 5071-5082.

- 1154  
1155 Kocgozlu, L., Saw, T.B., Le, A.P., Yow, I., Shagirov, M., Wong, E., Mège, R.M.,  
1156 Lim, C.T., Toyama, Y., and Ladoux, B. (2016). Epithelial cell packing  
1157 induces distinct modes of cell extrusions. *Curr. Biol.* **26**, 2942-2950.  
1158  
1159 Kocsisova, Z., Kornfeld, K., and Schedl, T. (2018). Cell cycle accumulation of the  
1160 proliferating cell nuclear antigen PCN-1 transitions from continuous in the  
1161 adult germline to intermittent in the early embryo of *C. elegans*. *BMC Dev.*  
1162 *Biol.* **18**, 12.  
1163  
1164 Krawchuk, D., Anani, S., Honma-Yamanaka, N., Polito, S., Shafik, M., and  
1165 Yamanaka, Y. (2015). Loss of LKB1 leads to impaired epithelial integrity  
1166 and cell extrusion in the early mouse embryo. *J. Cell Sci.* **128**, 1011-1022.  
1167  
1168 Kreutzer, M.A., Richards, J.P., De Silva-Udawatta, M.N., Temenak, J.J.,  
1169 Knoblich, J.A., Lehner, C.F., and Bennett, K.L. (1995). *Caenorhabditis*  
1170 *elegans* cyclin A- and B-type genes: A cyclin A multigene family, an  
1171 ancestral cyclin B3 and differential germline expression. *J. Cell Sci.* **108**,  
1172 2415-2424.  
1173  
1174 Lee, Y.U., Son, M., Kim, J., Shim, Y.H., and Kawasaki, I. (2016). CDC-25.2, a *C.*  
1175 *elegans* ortholog of cdc25, is essential for the progression of intestinal  
1176 divisions. *Cell Cycle.* **15**, 654-666.  
1177  
1178 Leung, C.T., and Brugge, J.S. (2012). Outgrowth of single oncogene-expressing  
1179 cells from suppressive epithelial environments. *Nature.* **482**, 410-413.  
1180  
1181 Mailand, N., Podtelejnikov, A. V., Groth, A., Mann, M., Bartek, J., and Lukas, J.  
1182 (2002). Regulation of G2/M events by Cdc25A through phosphorylation-  
1183 dependent modulation of its stability. *EMBO J.* **21**, 5911-5920.  
1184  
1185 Marshall, T.W., Lloyd, I.E., Delalande, J.M., Näthke, I., and Rosenblatt, J. (2011).  
1186 The tumor suppressor adenomatous polyposis coli controls the direction in  
1187 which a cell extrudes from an epithelium. *Mol. Biol. Cell.* **22**, 3962-3670.  
1188  
1189 McMahon, L., Legouis, R., Vonesch, J.L., and Labouesse, M. (2001). Assembly  
1190 of *C. elegans* apical junctions involves positioning and compaction by  
1191 LET-413 and protein aggregation by the MAGUK protein DLG-1. *J. Cell*  
1192 *Sci.* **114**, 2265-2277.  
1193  
1194 Mello, C.C., Kramer, J.M., Stinchcomb, D., and Ambros, V. (1991). Efficient gene  
1195 transfer in *C. elegans*: extrachromosomal maintenance and integration of  
1196 transforming sequences. *EMBO J.* **10**, 3959-3970.  
1197



- 1198 Ohsawa, S., Vaughen, J. and Igaki, T. (2018). Cell extrusion: a stress-  
1199 responsive force for good or evil in epithelial homeostasis. *Dev. Cell*  
1200 *44*, 284-296.  
1201
- 1202 Ossareh-Nazari, B., Katsiarimpa, A., Merlet, J., and Pintard, L. (2016). RNAi-  
1203 Based suppressor screens reveal genetic interactions between the  
1204 CRL2LRR-1 E3-ligase and the dna replication machinery in  
1205 *Caenorhabditis elegans*. *G3 Genes, Genomes, Genet.* *6*, 3431-3442.  
1206
- 1207 Otto, T., and Sicinski, P. (2017). Cell cycle proteins as promising targets in  
1208 cancer therapy. *Nat. Rev. Cancer.* *17*, 93-115.  
1209
- 1210 Rosenblatt, J., Raff, M.C., and Cramer, L.P. (2001). An epithelial cell destined for  
1211 apoptosis signals its neighbors to extrude it by an actin- and myosin-  
1212 dependent mechanism. *Curr. Biol.* *11*, 1847-1857.  
1213
- 1214 Rual, J.F., Ceron, J., Koreth, J., Hao, T., Nicot, A.S., Hirozane-Kishikawa, T.,  
1215 Vandenhaute, J., Orkin, S.H., Hill, D.E., van den Heuvel, S., and Vidal, M.  
1216 (2004). Toward improving *Caenorhabditis elegans* phenome mapping with  
1217 an ORFeome-based RNAi library. *Genome Res.* *14*, 2162-2168.  
1218
- 1219 Sakaue-Sawano, A., Kurokawa, H., Morimura, T., Hanyu, A., Hama, H., Osawa,  
1220 H., Kashiwagi, S., Fukami, K., Miyata, T., Miyoshi, H., Imamura, T.,  
1221 Ogawa, M., Masai, H., and Miyawaki, A. (2008). Visualizing  
1222 spatiotemporal dynamics of multicellular cell-cycle progression. *Cell.*  
1223 *132*, 487-498.  
1224
- 1225 Saw, T.B., Doostmohammadi, A., Nier, V., Kocgozlu, L., Thampi, S., Toyama, Y.,  
1226 Marcq, P., Lim, C.T., Yeomans, J.M., and Ladoux, B. (2017). Topological  
1227 defects in epithelia govern cell death and extrusion. *Nature.* *544*, 212-216.  
1228
- 1229 Schindelin, J., Arganda-Carreras, I., Frise, E., Kaynig, V., Longair, M., Pietzsch,  
1230 T., Preibisch, S., Rueden, C., Saalfeld, S., Schmid, B., Tinevez, J.Y.,  
1231 White, D.J., Hartenstein, V., Eliceiri, K., Tomancak, P., and Cardona, A.  
1232 (2012). Fiji: An open-source platform for biological-image analysis. *Nat.*  
1233 *Methods.* *9*, 676-682.  
1234
- 1235 Slattum, G., Gu, Y., Sabbadini, R. and Rosenblatt, J. (2014). Autophagy in  
1236 oncogenic K-Ras promotes basal extrusion of epithelial cells by degrading  
1237 S1P. *Curr. Biol.* *24*, 19–28.  
1238
- 1239 Spencer, S.L., Cappell, S.D., Tsai, F.C., Overton, K.W., Wang, C.L., and Meyer,  
1240 T. (2013). The proliferation-quiescence decision is controlled by a  
1241 bifurcation in CDK2 activity at mitotic exit. *Cell* *155*, 369-383.  
1242

- 1243 Stevens, H., Williams, A.B., and Michael, W.M. (2016). Cell-type specific  
1244 responses to DNA replication stress in early *C. elegans* embryos. *PLoS*  
1245 *One* *11*, e0164601.  
1246
- 1247 Streichan, S.J., Hoerner, C.R., Schneidt, T., Holzer, D., and Hufnagel, L. (2014).  
1248 Spatial constraints control cell proliferation in tissues. *Proc. Natl. Acad.*  
1249 *Sci.* *111*, 5586-5591.  
1250
- 1251 Sulston, J.E., Schierenberg, E., White, J.G., and Thomson, J.N. (1983). The  
1252 embryonic cell lineage of the nematode *Caenorhabditis elegans*. *Dev*  
1253 *Biol.* *100*, 64-119.  
1254
- 1255 Teuliere, J., Cordes, S., Singhvi, A., Talavera, K., and Garriga, G. (2014).  
1256 Asymmetric neuroblast divisions producing apoptotic cells require the  
1257 cytohesin GRP-1 in *Caenorhabditis elegans*. *Genetics.* *198*, 229-247.  
1258
- 1259 Timson, J. (1975). Hydroxyurea. *Mutat. Res.* *32*, 115-132.  
1260
- 1261 van den Heuvel, S. (2005). Cell cycle regulation. *WormBook*, ed. The *C. elegans*  
1262 *Research Community WormBook*, WormBook.  
1263
- 1264 van Rijnberk, L.M., van der Horst, S.E., van den Heuvel, S. and Ruijtenberg, S.  
1265 (2017). A dual transcriptional reporter and CDK-activity sensor marks cell  
1266 cycle entry and progression in *C. elegans*. *PLoS One* *12*, e0171600.  
1267
- 1268 Wallenfang, M.R., and Seydoux, G. (2002). *cdk-7* is required for mRNA  
1269 transcription and cell cycle progression in *Caenorhabditis elegans*  
1270 embryos. *Proc. Natl. Acad. Sci. U. S. A.* *99*, 5527-5532.  
1271
- 1272 Wernike, D., Chen, Y., Mastronardi, K., Makil, N., and Piekny, A. (2016).  
1273 Mechanical forces drive neuroblast morphogenesis and are required for  
1274 epidermal closure. *Dev. Biol.* *412*, 261-277.  
1275
- 1276 Wu, S. K., Gomez, G. A., Michael, M., Verma, S., Cox, H. L., Lefevre, J. G.,  
1277 Parton, R. G., Hamilton, N. A., Neufeld, Z. and Yap, A. S. (2014). Cortical  
1278 F-actin stabilization generates apical-lateral patterns of junctional  
1279 contractility that integrate cells into epithelia. *Nat. Cell Biol.* *16*, 167–178.  
1280
- 1281 Xiao, Z., Chen, Z., Gunasekera, A.H., Sowin, T.J., Rosenberg, S.H., Fesik, S.,  
1282 and Zhang, H. (2003). Chk1 mediates S and G2 arrests through Cdc25A  
1283 degradation in response to DNA-damaging agents. *J. Biol. Chem.* *278*,  
1284 21767-21773.  
1285
- 1286 Yazinski, S.A., and Zou, L. (2016). Functions, regulation, and therapeutic  
1287 implications of the ATR checkpoint pathway. *Annu. Rev. Genet.* *50*, 155-  
1288 173.

- 1289  
1290 Yeong, F.M. (2004). Anaphase-promoting complex in *Caenorhabditis elegans*.  
1291 Mol. Cell. Biol. 24, 2215-2225.  
1292  
1293 Zeman, M.K., and Cimprich, K.A. (2014). Causes and consequences of  
1294 replication stress. Nat. Cell Biol. 16, 2-9.  
1295  
1296 Zerjatke, T., Gak, I.A., Kirova, D., Fuhrmann, M., Daniel, K., Gonciarz, M., Müller,  
1297 D., Glauche, I., and Mansfeld, J. (2017). Quantitative cell cycle analysis  
1298 based on an endogenous all-in-one reporter for cell tracking and  
1299 classification. Cell Rep. 19, 1953-1966.  
1300  
1301 Ziel, J.W., Hagedorn, E.J., Audhya, A., and Sherwood, D.R. (2009). UNC-6  
1302 (netrin) orients the invasive membrane of the anchor cell in *C. elegans*.  
1303 Nat. Cell Biol. 11, 183-189.  
1304
